# Supplementary material for: Massively parallel RNA device engineering in mammalian cells with RNA-Seq
Source: PubMed Central journal article supplement (PMC6757056; doi:10.1038/s41467-019-12334-y), 2019-09-23
Supplement: 41467_2019_12334_MOESM1_ESM.pdf [file 41467_2019_12334_MOESM1_ESM.pdf]

SUPPLEMENTARY INFORMATION

**Massively Parallel RNA Device Engineering in Mammalian Cells  
with RNA-Seq**

Xiang et al.

## Supplementary Figures

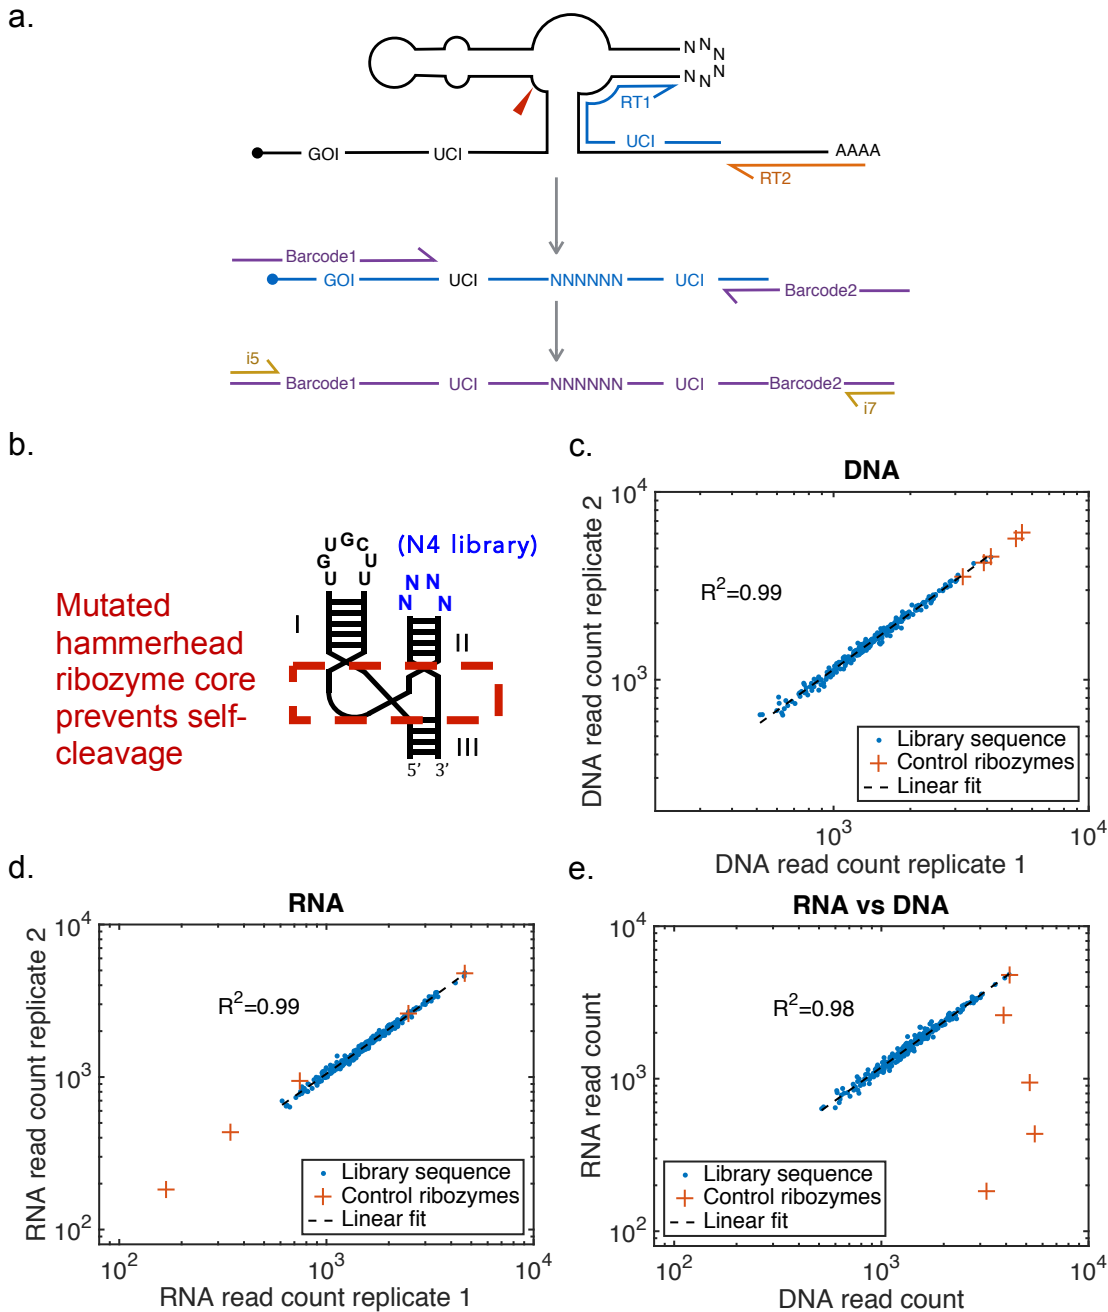

### Supplementary Figure 1. RNA-Seq quantitatively measures raw RNA and DNA read counts for a control library of 256 unique sequences.

(a) A schematic illustrating the mechanism of reverse transcription and primer binding sites on the ribozyme switch sequence followed by library barcoding and Illumina adapter sequence PCR. UCI, unique coverage index.

(b) A schematic showing the non-cleaving ribozyme library, which consists of a mutated ribozyme core to prevent self-cleavage and a randomized loop II.

(c) DNA read count from replicate RNA-Seq experiments of the non-cleaving ribozyme library ( $R^2 = 0.99$ ). Each dot represents a unique sequence with over 100 DNA read count. Pluses are spiked-in control ribozymes.

(d) RNA read count from replicate RNA-Seq experiments of the non-cleaving ribozyme library ( $R^2 = 0.99$ ). Each dot represents a unique sequence with over 100 RNA read count.

(e) RNA read count plotted against DNA read count from an RNA-Seq experiment for the non-cleaving ribozyme library ( $R^2 = 0.98$ ). Each dot is a unique sequence with over 100 RNA and DNA read count.

(c-e) All  $R^2$  values are based on the raw read counts.

a.

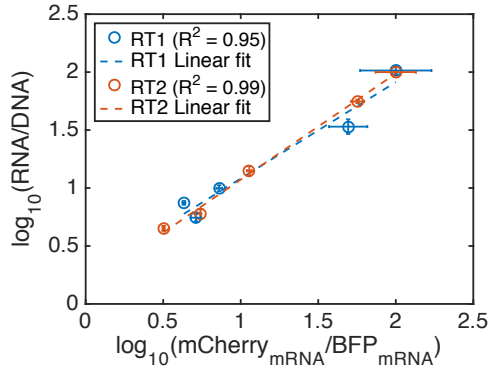

b.

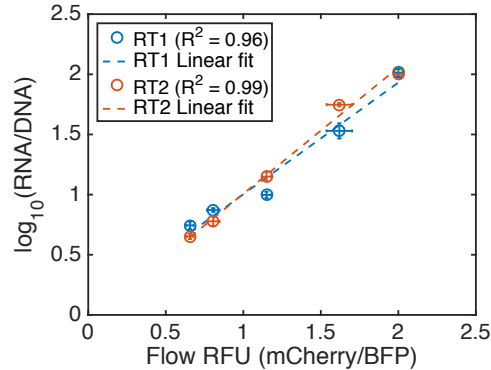

c.

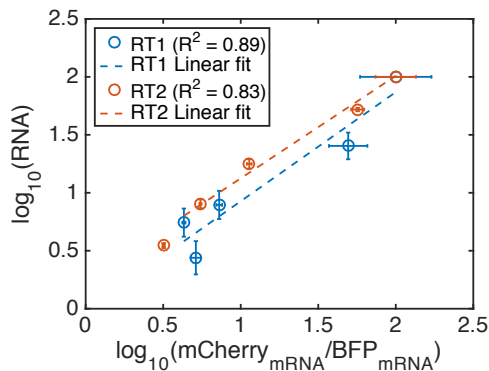

d.

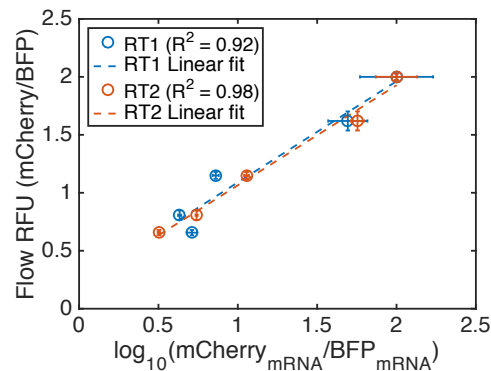

**Supplementary Figure 2. RNA read counts from RNA-seq assays correlate with qPCR measurements of transcript levels and flow cytometry measurements of reporter fluorescence levels for control ribozymes.**

(a) Normalized RNA read count from an RNA-Seq assay plotted against normalized mRNA levels from a qPCR assay. qPCR values are reported as mCherry transcript levels normalized to BFP transcript levels (a transfection control).

(b) Normalized RNA read count from an RNA-Seq assay plotted against relative fluorescence values of reporter protein expression, mCherry/BFP, from flow cytometry analysis of individual sequences.

(c) Unnormalized RNA read count from an RNA-Seq assay plotted against normalized mRNA levels from a qPCR assay.

(d) Relative fluorescence values of reporter protein expression, mCherry/BFP, from flow cytometry analysis of individual sequences plotted against normalized mRNA levels from a qPCR assay.

All values are  $\log_{10}$  based on an arbitrary scale where sTRSVctl is set to 2. qPCR measurements are for three replicates, RNA-Seq measurements are for two or more replicates, and flow cytometry measurements are for four biological samples. Error bars indicate standard deviations of the replicates. Dashed lines are a result of a linear fit to the indicated data. RT1 and RT2 are primers used for reverse transcription, as indicated in Supplementary Figure 1a. All  $R^2$  values are based on  $\log_{10}$  transformed values.

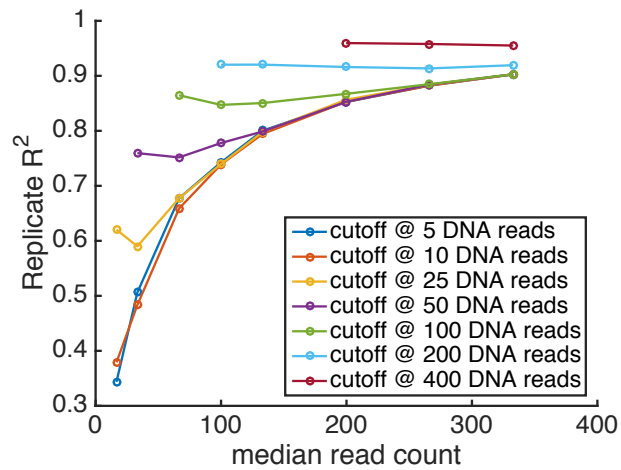

**Supplementary Figure 3. Simulation of  $R^2$  as a function of median library sequence read count and read count cutoff.** The RNA-Seq data for the xanthine N5-6 library was used to generate the graph by random data sampling (without replacement) as performed in MATLAB. All  $R^2$  values are based on  $\log_{10}$  transformed normalized RNA values.

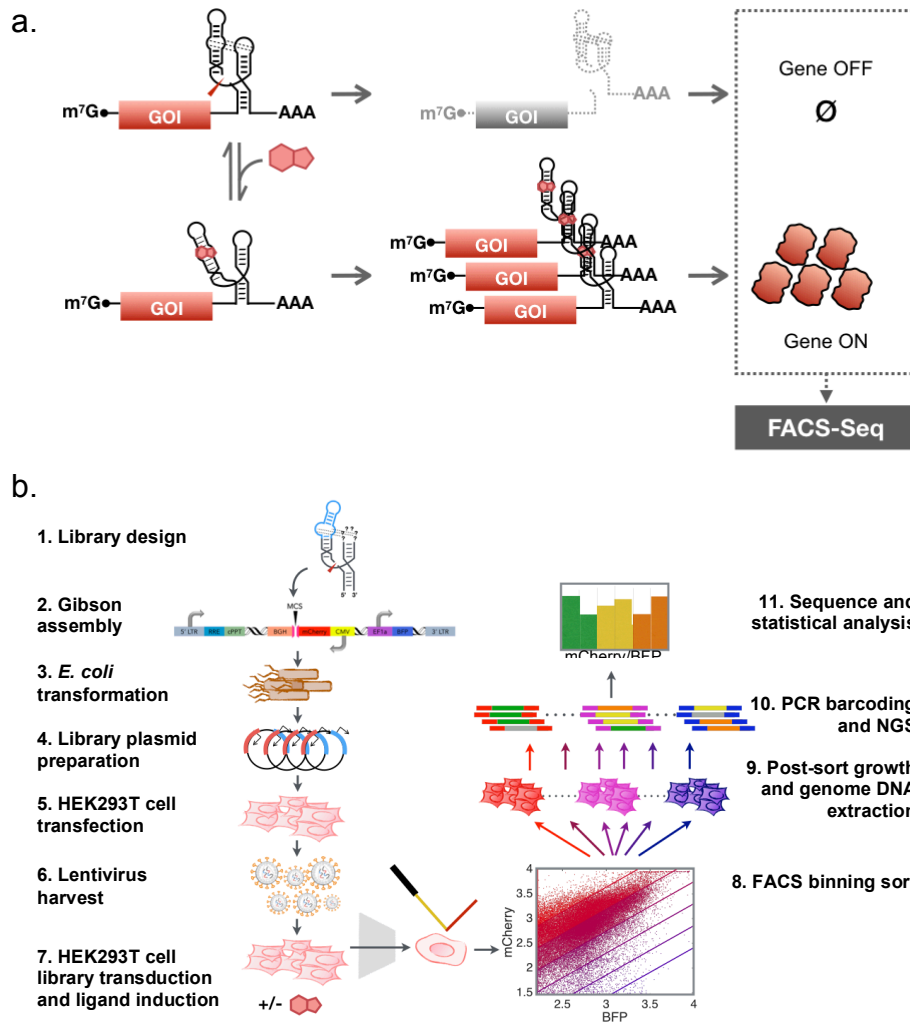

**Supplementary Figure 4. Quantitative FACS-Seq for assaying protein expression levels as a result of ribozyme switch regulatory activity**

(a) A schematic illustrating the mechanism by which ribozyme switches achieve conditional gene expression regulation, indicating that protein expression levels resulting from ribozyme switch activity can be assayed with FACS-Seq.

(b) FACS-seq workflow for measuring differential protein expression levels associated with a ribozyme switch library.

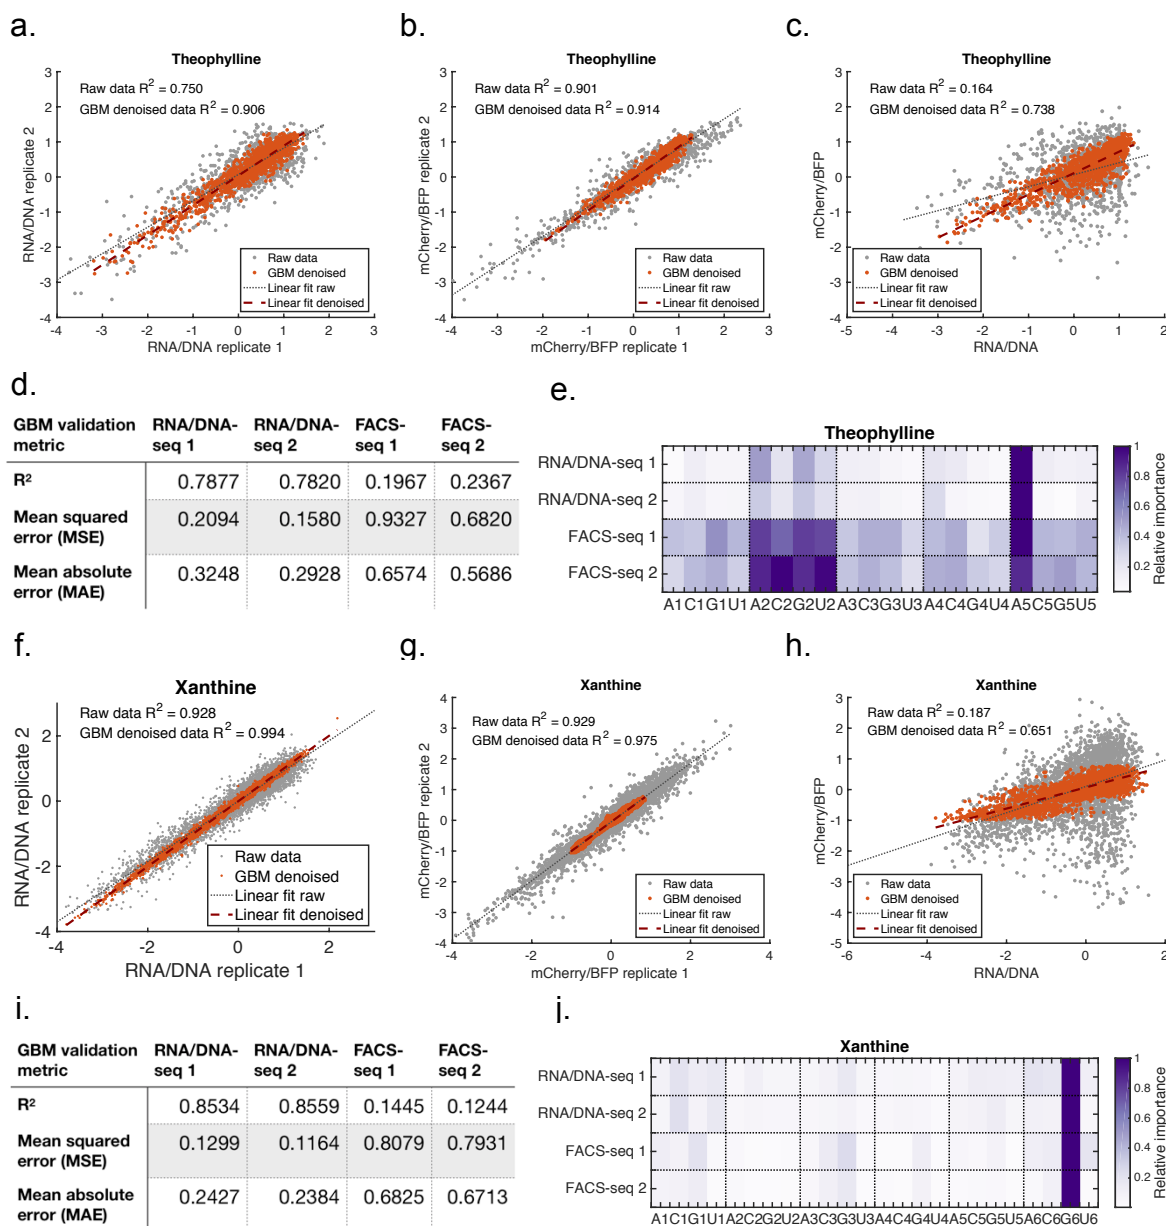

### Supplementary Figure 5. RNA-Seq and FACS-Seq data denoised using Gradient Boosting Machine (GBM) ensemble regression implemented in H2O.ai.

- (a) Normalized RNA read counts from replicate RNA-seq replicates experiments for 1,275 theophylline ribozyme switch library members with  $>20$  read count coverage.
- (b) Relative fluorescence values from replicate FACS-seq experiments for the 1,275 theophylline ribozyme switch library members with  $>20$  read count coverage.
- (c) Normalized RNA read count plotted against relative fluorescence values for the theophylline ribozyme switch library.
- (d) GBM validation metrics showing performance of the converged model trained on the theophylline library data.
- (e) Relative importance of loop II base position and identity in training the GBM on data from the RNA-seq and FACS-seq assays for the theophylline ribozyme switch library.
- (f) Normalized RNA read counts from replicate RNA-seq replicates experiments for 5,069 xanthine ribozyme switch library members with  $>100$  read count coverage.

- (g) Relative fluorescence values from replicate FACS-seq experiments for the 5,069 xanthine ribozyme switch library members with >100 read count coverage.
  - (h) Normalized RNA read count plotted against relative fluorescence values for the xanthine ribozyme switch library.
  - (i) GBM validation metrics showing performance of the converged model trained on the xanthine library data.
  - (j) Relative importance of loop II base position and identity in training the GBM on data from the RNA-seq and FACS-seq assays for the xanthine ribozyme switch library.
- (a-d, f-i) All  $R^2$  values are based on  $\log_{10}$  transformed values.



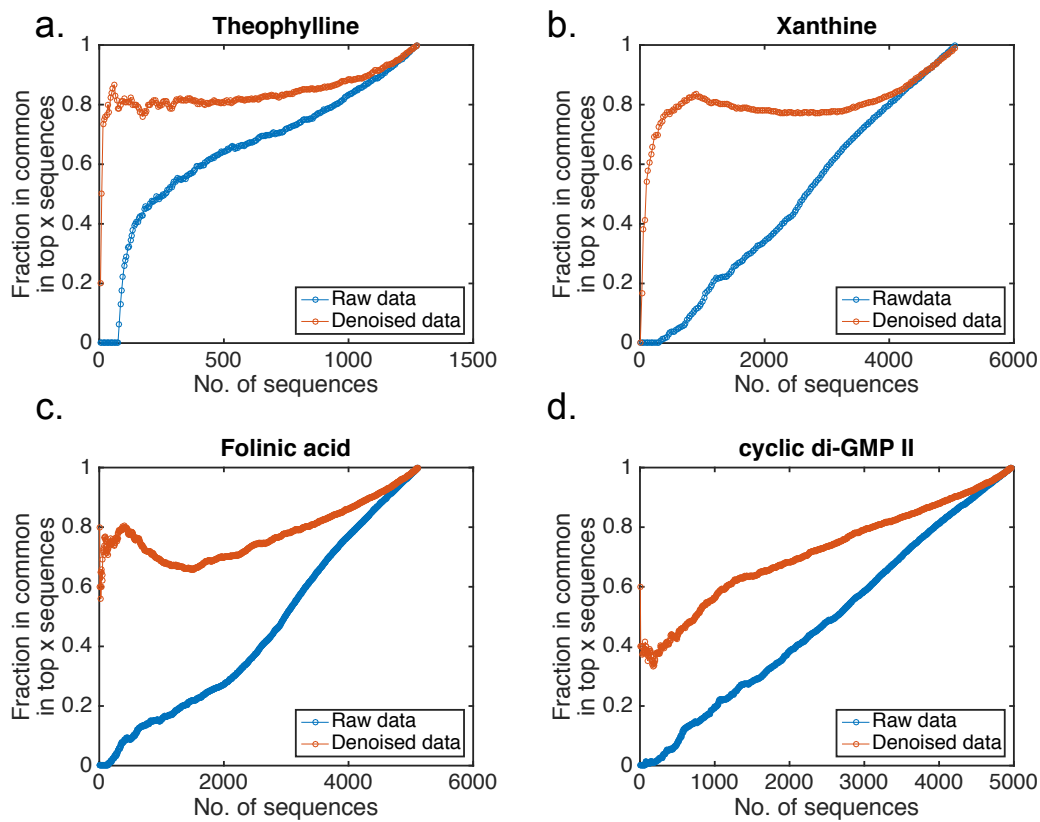

**Supplementary Figure 6. The fraction of sequences shared between RNA-Seq and FACS-Seq results.** Data is plotted as the top x sequences against the number of sequences. Ranking is by activation ratio. Results are shown for raw data (blue) and data denoised using AutoML (red), for (a) theophylline N4-5, (b) xanthine N5-6, (c) folinic acid N5-6, and (d) cyclic di-GMP-II N5-6 libraries in the mCherry vector pCS4076.

a.

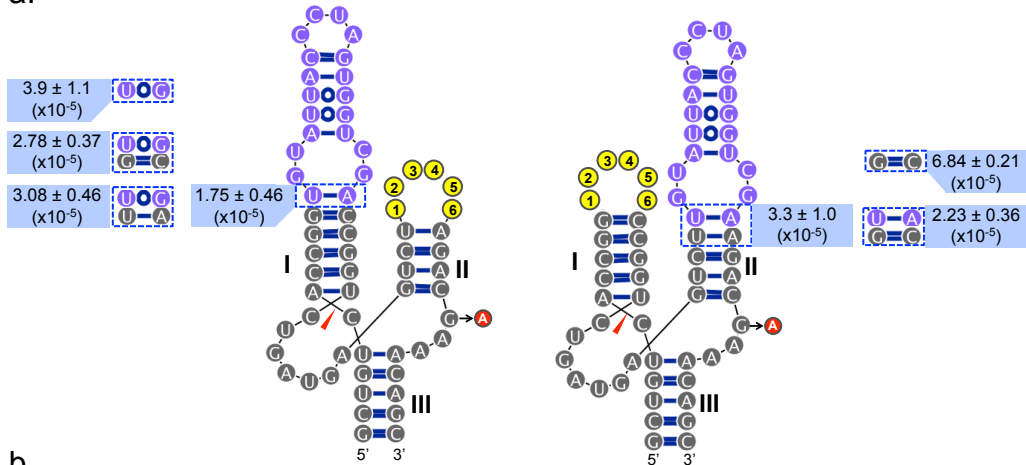

b.

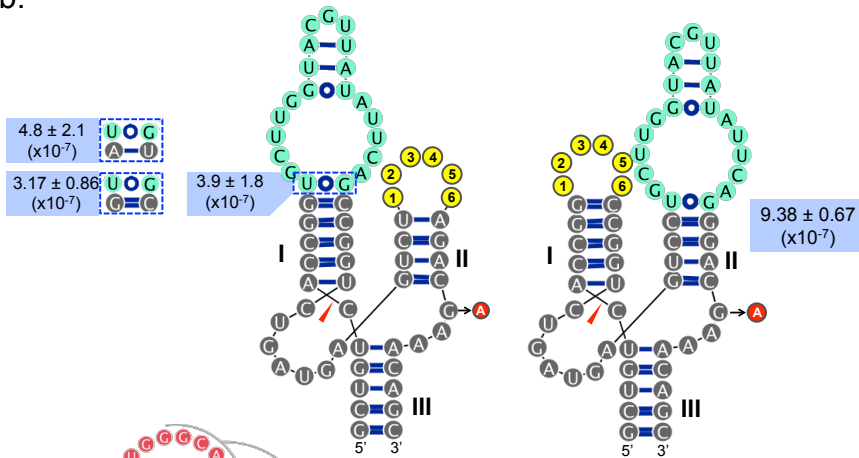

c.

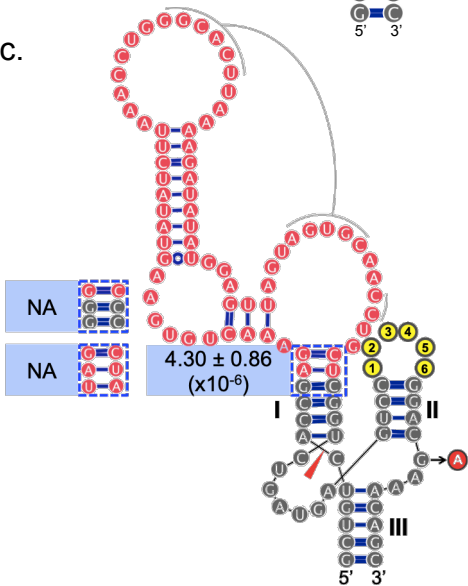

d.

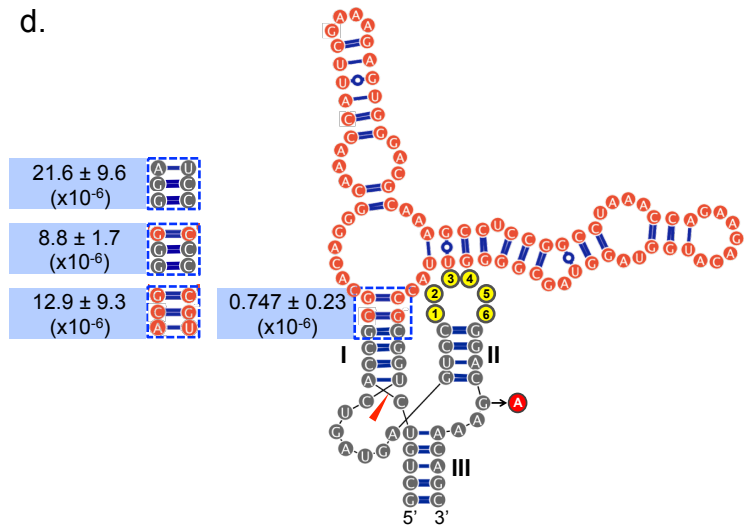

**Supplementary Figure 7. Library designs integrating aptamer sequences (colored) with the sTRSV hammerhead ribozyme domain (gray).** Equilibrium dissociation constants ( $K_D$ ) of the aptamer integrated libraries as measured by surface plasmon resonance (SPR) binding affinity assays are indicated next to each design in shaded blue boxes.  $K_D$  values are in molar units (M), and the error reported is the standard error from the logistic regression fit. NA, not applicable or

no binding observed. Final library designs for each ligand group are the main figures in (a) left for xanthine, (b) left for folinic acid, (c) and (d) for cyclic di-GMP-II and cyclic di-GMP-I. Alternate tested designs are shown in blue dashed boxes, where the sequence differs from the final designs. Red circled nucleotide indicates a G to A mutation in the catalytic core to prevent ribozyme self-cleavage. Red narrow triangle indicates where the cleavage site would occur. Secondary structures are predicted from RNAstructure, with manual curation of tertiary interactions of the aptamer from crystal or NMR structures.

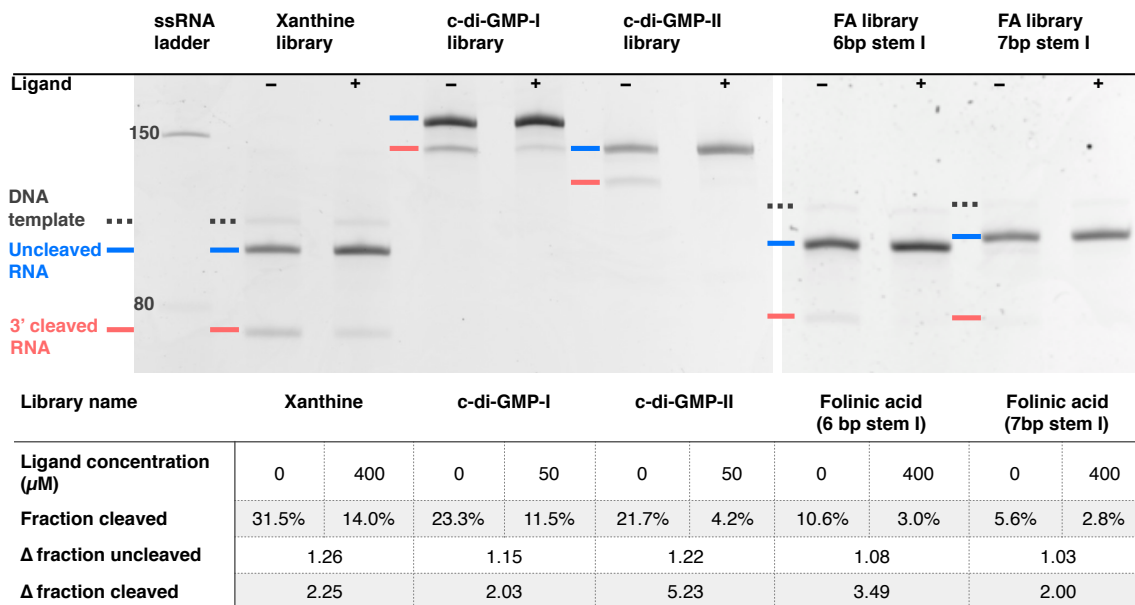

**Supplementary Figure 8. Denaturing PAGE for xanthine, cyclic di-GMP, and folinic acid ribozyme switch libraries from *in vitro* transcribed RNA.** Library RNA was synthesized in a co-transcriptional cleavage reaction and are indicated as a mixture of uncleaved (blue) and 3' cleaved (red) RNAs on the gel. Each library is analyzed under two conditions, corresponding to -/+ ligand conditions in the transcription reaction and ligand concentrations are indicated in the table. Gels are stained with GelRed and darkness correlates with fluorescence intensity. The 80 and 150 nucleotide ssRNA ladder bands are indicated in the first lane.

a.

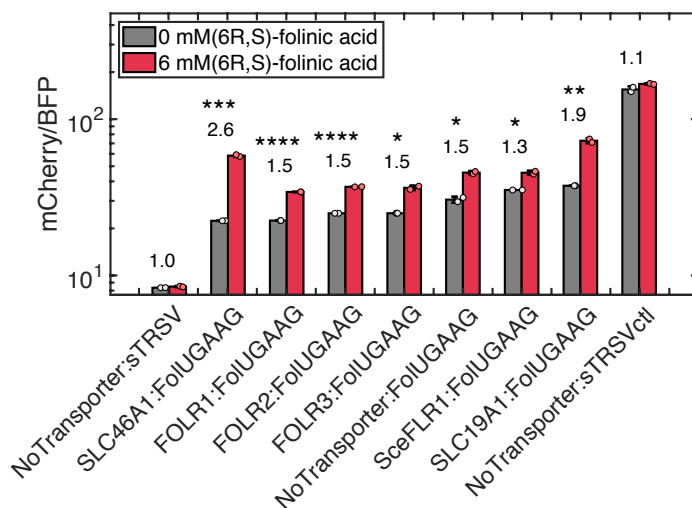

b.

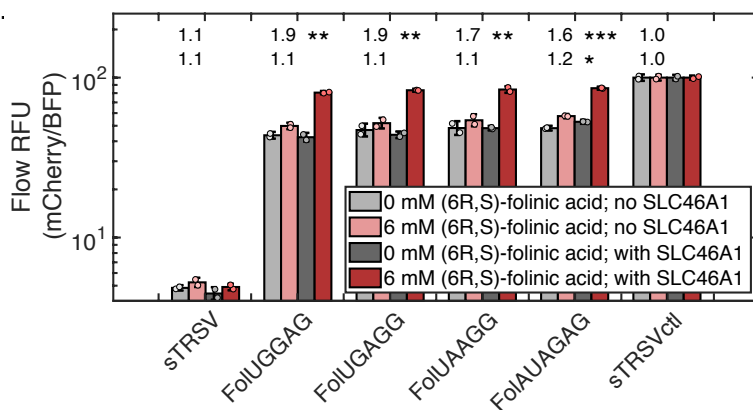

**Supplementary Figure 9. Flow cytometry analysis to assay for folate transporter activity in inducing reporter gene expression from a folinic acid ribozyme switch.**

(a) Relative fluorescence values (RFU) from flow cytometry analysis of HEK293T cells co-transfected with the indicated folate transporter and a control folinic acid ribozyme switch (FolUGAAG). Cells are incubated with 0 or 6 mM folinic acid for 48 hours. Labels above bars refer to activation ratio of the relative fluorescence values.

(b) Relative fluorescence values (RFU) from flow cytometry analysis of HEK293T cells that express the folate transporter, SLC46A1. Cells are transfected with the indicated folinic acid ribozyme switches and incubated with 0 or 6 mM folinic acid for 48 hours. Labels above bars refer to activation ratio; first row are results in a HEK293T cell line that stably expresses SLC46A1, the second row are results in a parental HEK293T cell line.

Error bars correspond to standard deviation of two biological replicates. Asterisks indicate the Benjamini-Hochberg positive false discovery rate of switching significance, using p-values from unpaired, one-tailed t-test, \* 5%, \*\* 0.5%, \*\*\* 0.05%, \*\*\*\* 0.005%. sTRSV is the wild-type hammerhead ribozyme; sTRSVctl is a non-cleaving mutant of sTRSV. Filled circles are individual replicate data points.

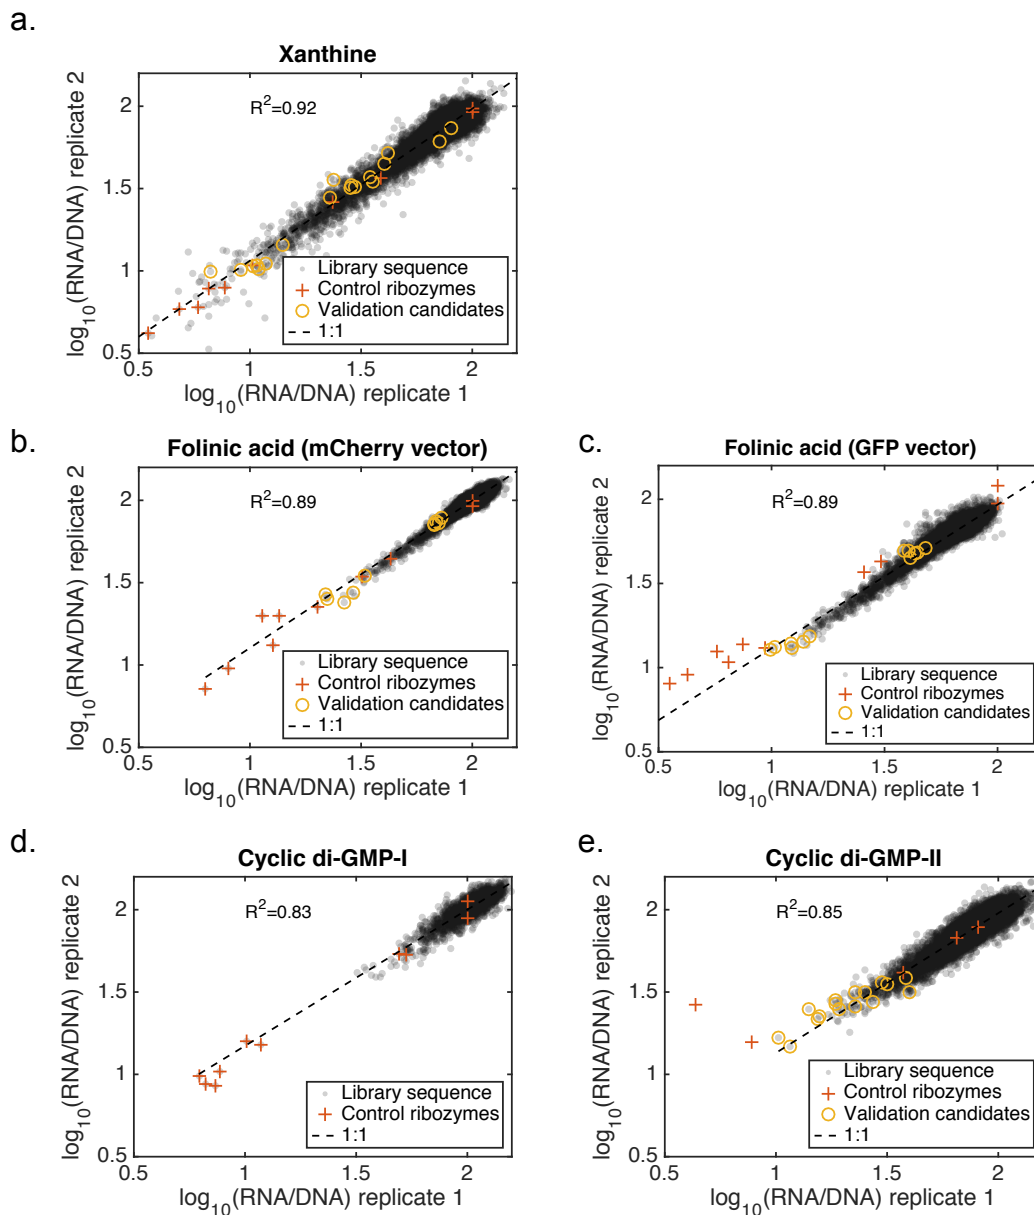

**Supplementary Figure 10. Normalized RNA read counts from replicate RNA-Seq experiments.** (a) 5,083 unique sequences characterized for the xanthine N5-6 library ( $R^2 = 0.92$ ), (b) 5,124 unique sequences characterized for the folinic acid N5-6 library in the mCherry vector ( $R^2 = 0.89$ ), (c) 5,171 unique sequences characterized for the folinic acid N5-6 library in the GFP vector ( $R^2 = 0.89$ ), (d) 1,006 unique sequences characterized for the cyclic-di-GMP-I N5 library ( $R^2 = 0.83$ ), (e) 4,961 unique sequences characterized for the cyclic-di-GMP-II N5-6 ( $R^2 = 0.85$ ). Each dot represents a unique sequence with over 100 sequencing read counts in an experiment. Pluses are spiked-in control ribozymes; circles indicate sequences selected for validation. All  $R^2$  values are based on  $\log_{10}$  transformed normalized RNA values.

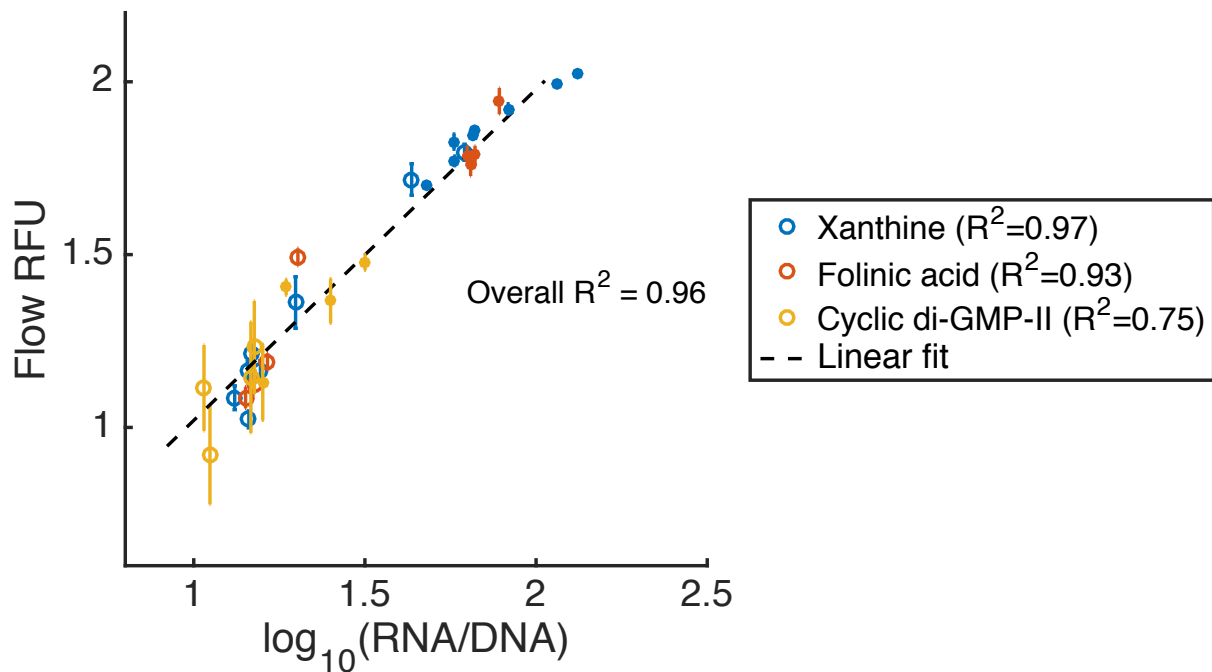

**Supplementary Figure 11. Relative fluorescence values from flow cytometry analysis of individual sequences plotted against normalized RNA read counts from RNA-Seq assays.** Dashed line represents a linear fit to the data ( $R^2 = 0.96$ ). Open circles, without ligand; filled circles, with ligand. Error bars are standard deviations of two biological replicates. All  $R^2$  values are based on  $\log_{10}$  transformed normalized RNA values.

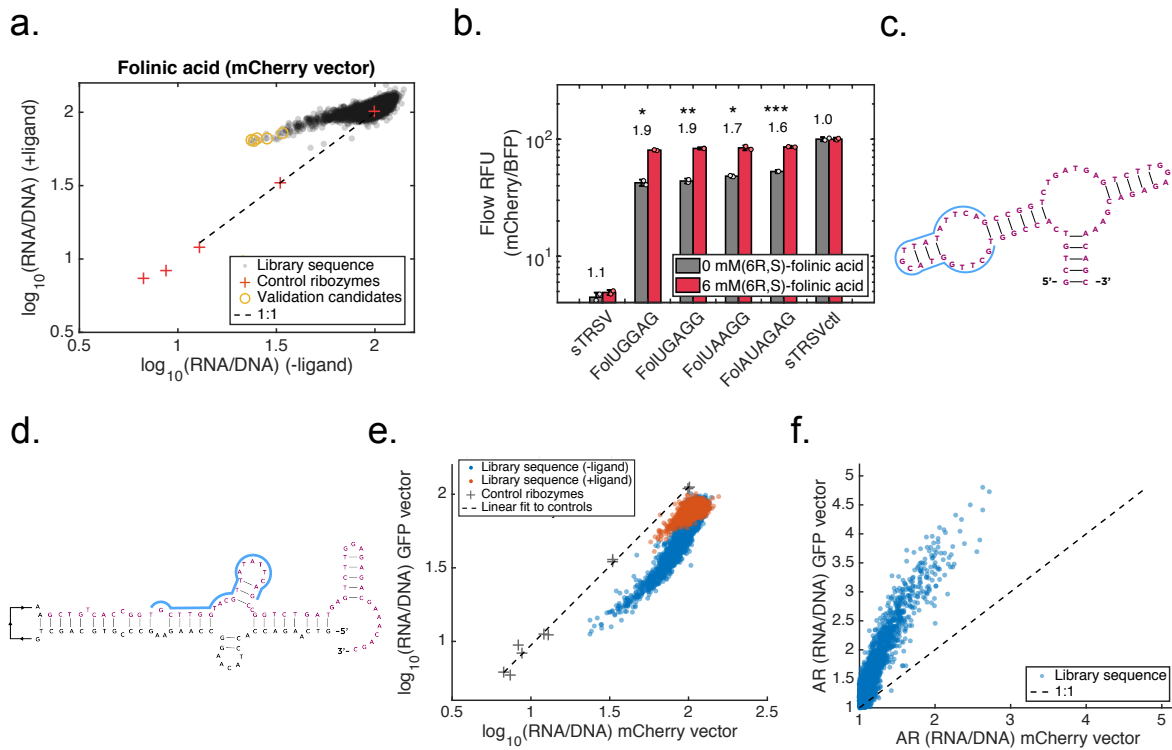

**Supplementary Figure 12. Context dependent folding of the folinic acid ribozyme switches.**

(a) Normalized RNA read counts from an RNA-Seq assay performed on a folinic ribozyme switch library in the absence and presence of ligand in HEK293T cells overexpressing the SLC46A1 folate transporter. Each dot represents a unique sequence with over 100 sequencing read counts in an experiment. Pluses are spiked-in control ribozymes; circles are sequences selected for validation; +/- ligand conditions are 0/6 mM (6R,S)-folinic acid. Dashed line is a 1:1 ratio of the values of the two axes.

(b) Flow cytometry analysis of individual members in the folinic acid ribozyme switch library. Activation ratio of mCherry/BFP is indicated above each set of bars. sTRSV is the wild-type hammerhead ribozyme; sTRSVctl is a non-cleaving mutant of sTRSV; asterisks indicate the Benjamini-Hochberg positive false discovery rate of switching significance, using p-values from unpaired, one-tailed t-test, \* 5%, \*\* 0.5%, \*\*\* 0.05%, \*\*\*\* 0.005%; error bars indicate standard deviation of two biological replicates. Filled circles are individual replicate data points.

(c) Predicted secondary structure of the properly folded folinic acid ribozyme switch FolUGGAG as predicted by RNAstructure. Blue line indicates the folinic acid aptamer.

(d) Predicted secondary structure of the folinic acid switch FolUGGAG in the context of the mCherry transcript. Blue line indicates the folinic acid aptamer. Red, sequence associated with the sTRSV ribozyme; black, sequence associated with the mCherry coding sequence.

(e) Normalized RNA read counts from an RNA-Seq assay performed on the folinic acid ribozyme switch library in the context of the eGFP reporter transcript plotted against the normalized RNA read counts in the context of the mCherry reporter transcript. Each dot represents a unique sequence; dashed line is a linear fit to the control ribozymes.

(f) Activation ratio of normalized RNA read counts for the folinic acid ribozyme switch library in the context of the eGFP reporter transcript plotted against the activation ratio in the context of the mCherry reporter transcript. Dashed line is a 1:1 ratio of the values of the two axes.



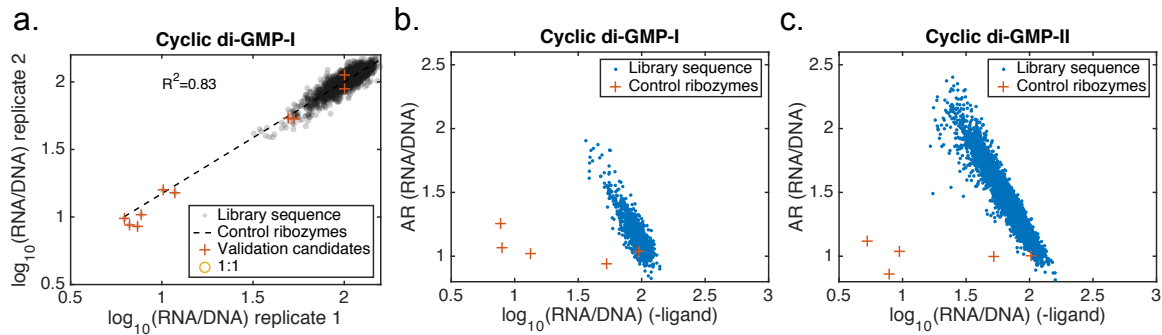

**Supplementary Figure 13. RNA-Seq analysis of cyclic di-GMP libraries.**

- (a) Normalized RNA read counts from an RNA-seq assay performed on a cyclic di-GMP-I ribozyme switch library in the absence and presence of ligand. Each dot represents a unique sequence with over 100 sequencing read counts (1,011 sequences). Pluses are spiked-in control ribozymes; +/- ligand conditions are 0/1 mM cyclic di-GMP.
- (b) Activation ratio as a function of normalized RNA read counts in the absence of ligand for the cyclic di-GMP-I ribozyme switch library.
- (c) Activation ratio as a function of normalized RNA read counts in the absence of ligand for the cyclic di-GMP-II ribozyme switch library. Each dot is a unique sequence with over 100 sequencing read counts (4,966 sequences).

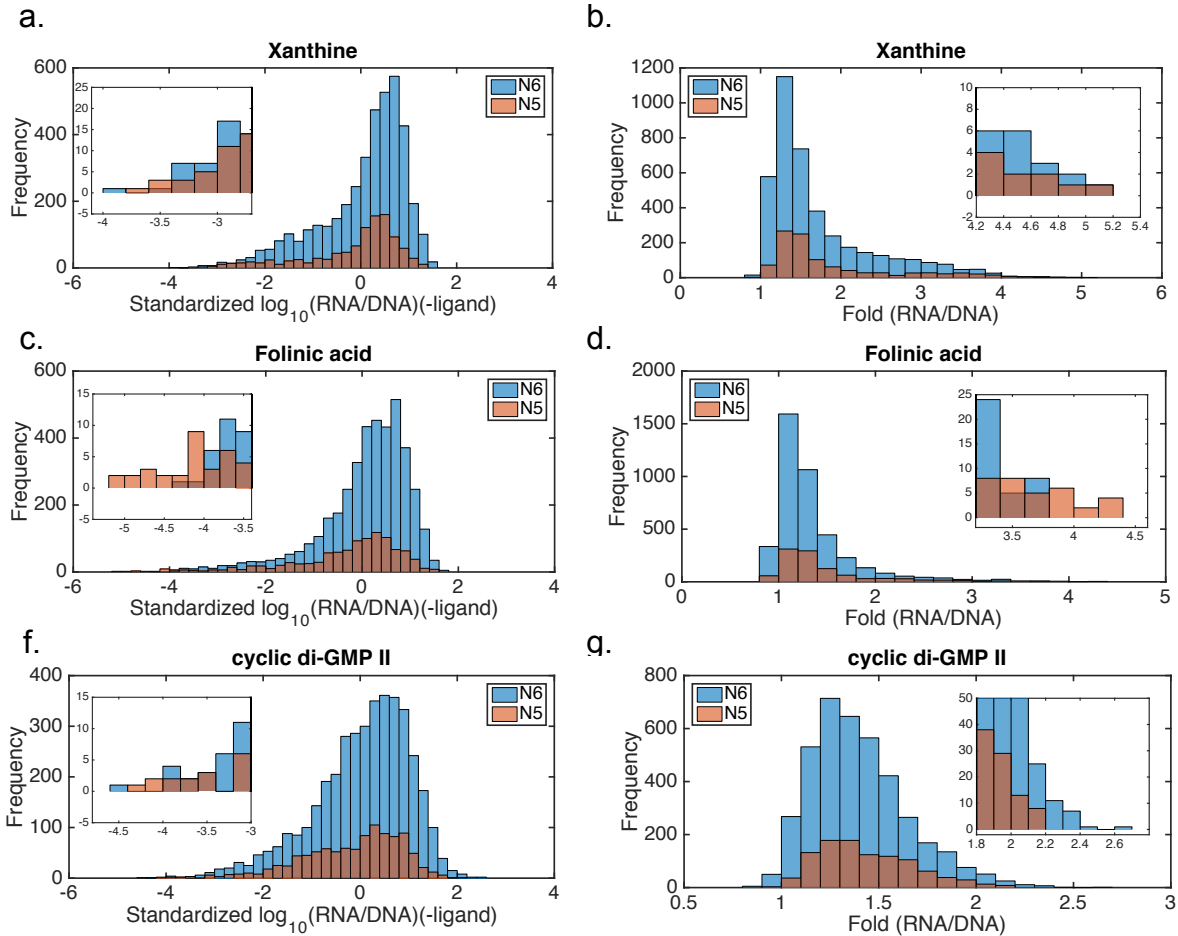

**Supplementary Figure 14. Distribution of standardized, normalized RNA read counts and activation ratios of normalized RNA read counts.**

(a) Histogram of standardized, normalized RNA read counts from an RNA-Seq assay for N5 and N6 loop II sequences of the xanthine ribozyme switch library. Inset zooms into the sequences with the lowest normalized RNA read counts.

(b) Activation ratios of normalized RNA read counts from an RNA-Seq assay for N5 and N6 loop II sequences of the xanthine ribozyme switch library. Inset zooms into the sequences with the highest activation ratios.

(c) Histogram of standardized, normalized RNA read counts from an RNA-Seq assay for N5 and N6 loop II sequences of the folinic acid ribozyme switch library. Inset zooms into the sequences with the lowest normalized RNA read counts.

(d) Activation ratios of normalized RNA read counts from an RNA-Seq assay for N5 and N6 loop II sequences of the folinic acid ribozyme switch library. Inset zooms into the sequences with the highest activation ratios.

(e) Histogram of standardized, normalized RNA read counts from an RNA-Seq assay for N5 and N6 loop II sequences of the cyclic di-GMP-II ribozyme switch library. Inset zooms into the sequences with the lowest normalized RNA read counts.

(f) Activation ratios of normalized RNA read counts from an RNA-Seq assay for N5 and N6 loop II sequences of the cyclic di-GMP-II ribozyme switch library. Inset zooms into the sequences with the highest activation ratios.

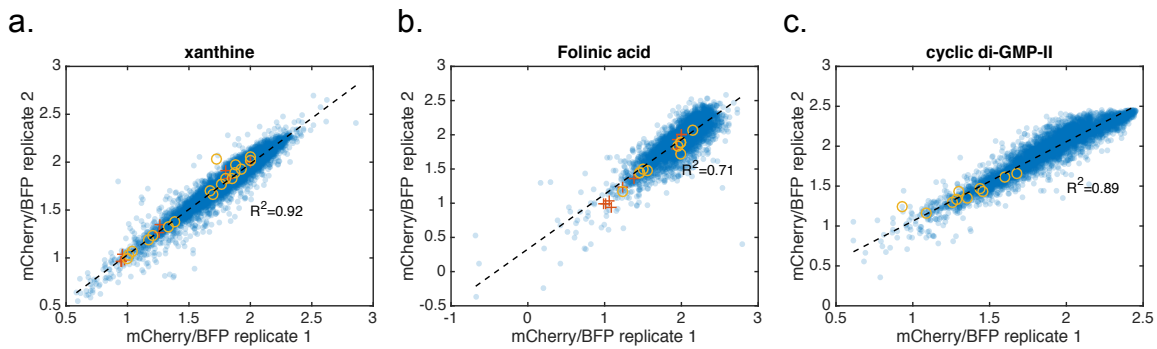

**Supplementary Figure 15. Replicate FACS-seq experiments of new ribozyme switch libraries.**

(a) Relative fluorescence values from replicate FACS-Seq experiments ( $R^2 = 0.92$ ) performed on a xanthine ribozyme switch library. Each dot represents a unique sequence with over 100 sequencing read counts in an experiment (2,550 sequences). Pluses are spiked-in control ribozymes; circles are sequences selected from RNA-Seq for validation.

(b) Relative fluorescence values from replicate FACS-Seq experiments ( $R^2 = 0.71$ ) performed on a folinic acid ribozyme switch library. Each dot represents a unique sequence with over 100 sequencing read counts in an experiment (1,784 sequences).

(c) Relative fluorescence values from replicate FACS-Seq experiments ( $R^2 = 0.89$ ) performed on a cyclic di-GMP-II ribozyme switch library. Each dot represents a unique sequence with over 100 sequencing read counts in an experiment (2,293 sequences).

All  $R^2$  values are based on  $\log_{10}$  transformed relative fluorescence values.

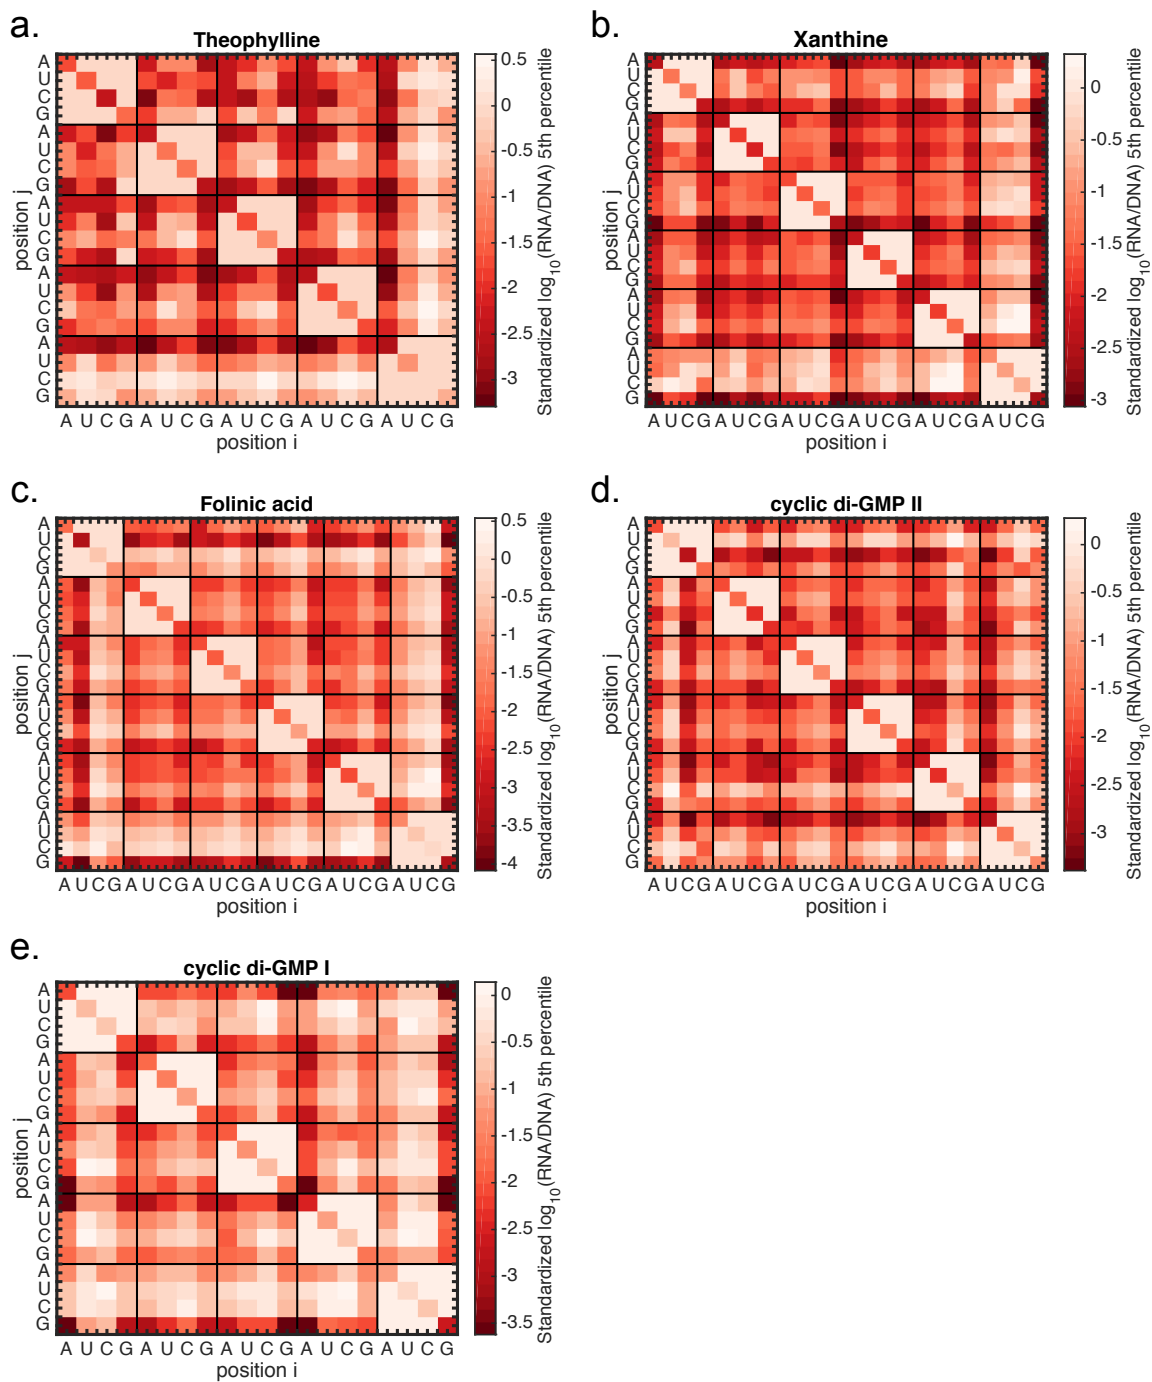

**Supplementary Figure 16. Pairwise contribution to the 5<sup>th</sup> percentile standardized  $\log_{10}(\text{RNA/DNA})$  of the library sequence for each of A, U, C, G nucleotides at two positions,  $i$  and  $j$ , within loop II. Results are shown for (a) theophylline N4-5, (b) xanthine N5-6, (c) folinic acid N5-6, (d) cyclic di-GMP-II N5-6, and (e) cyclic di-GMP-I N5 ribozyme switch libraries using data from RNA-seq.**

a. Theophylline

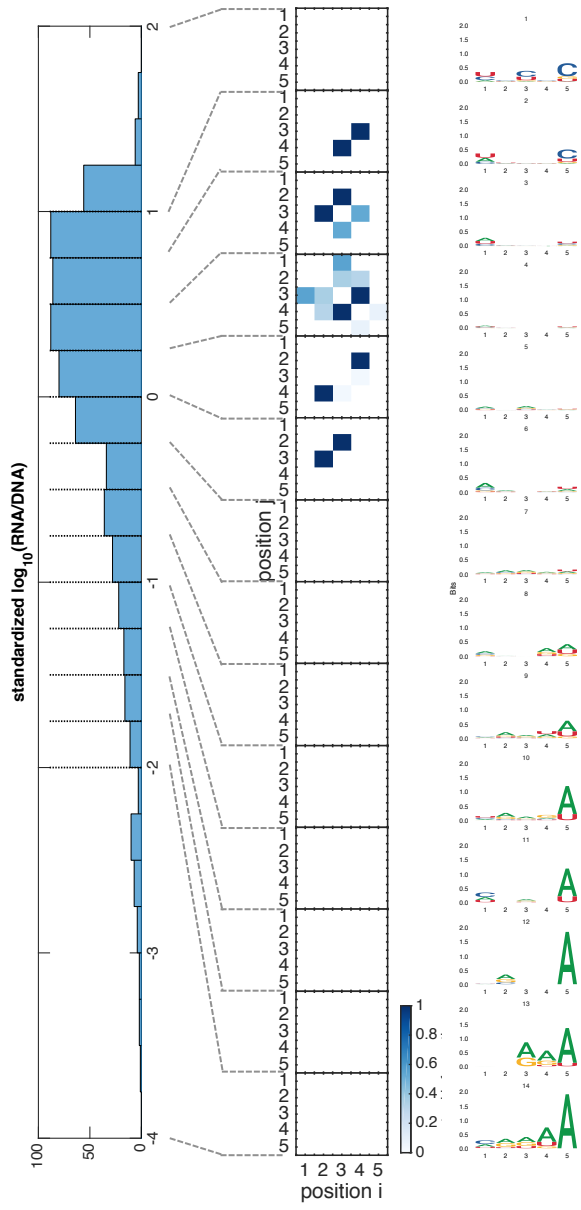

b. Xanthine

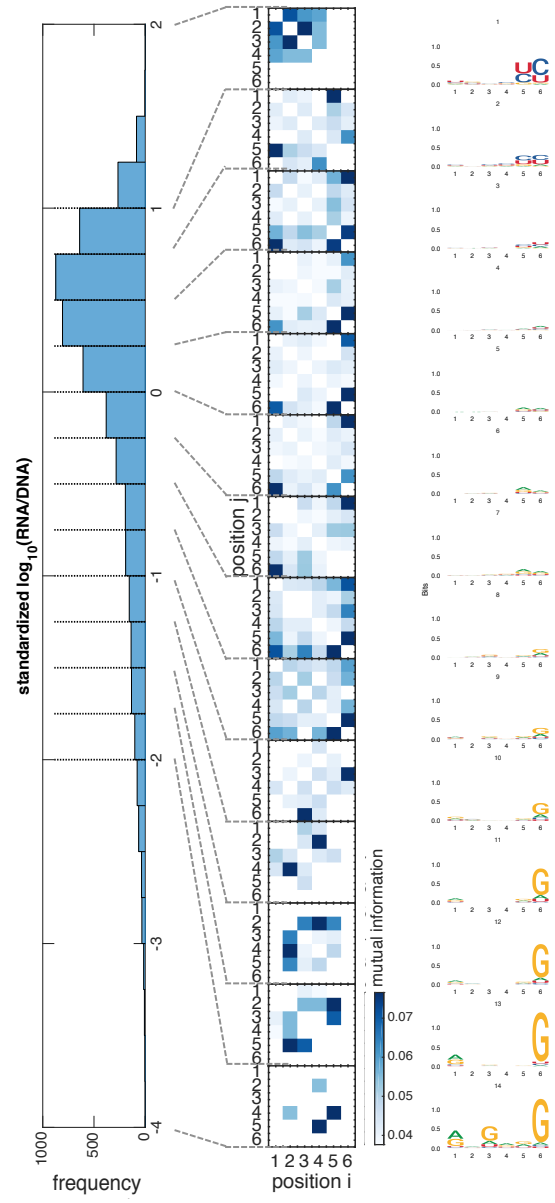

c.

Folinic acid

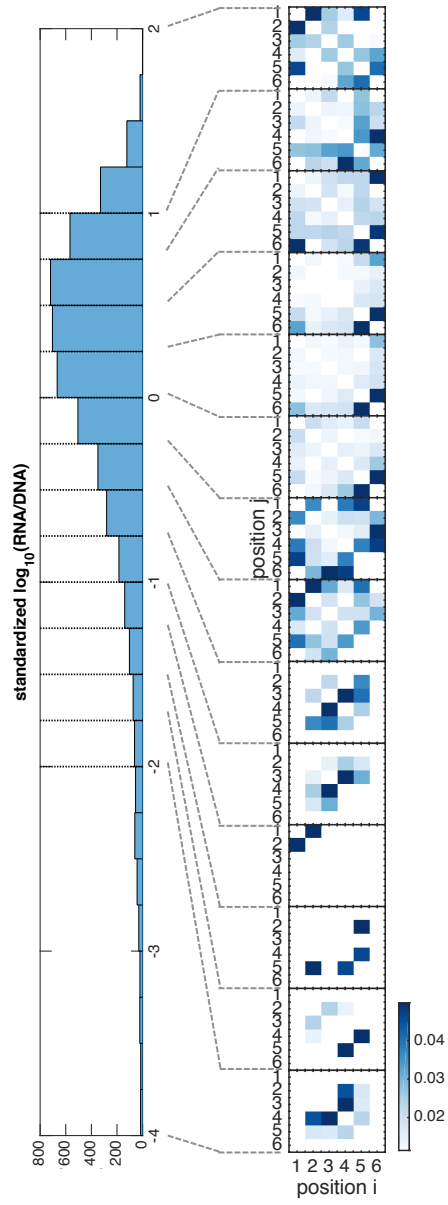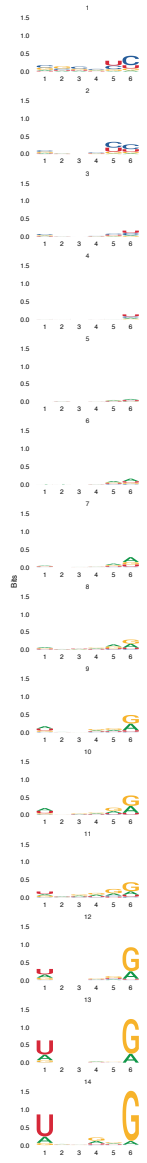

d.

Cyclic di-GMP-II

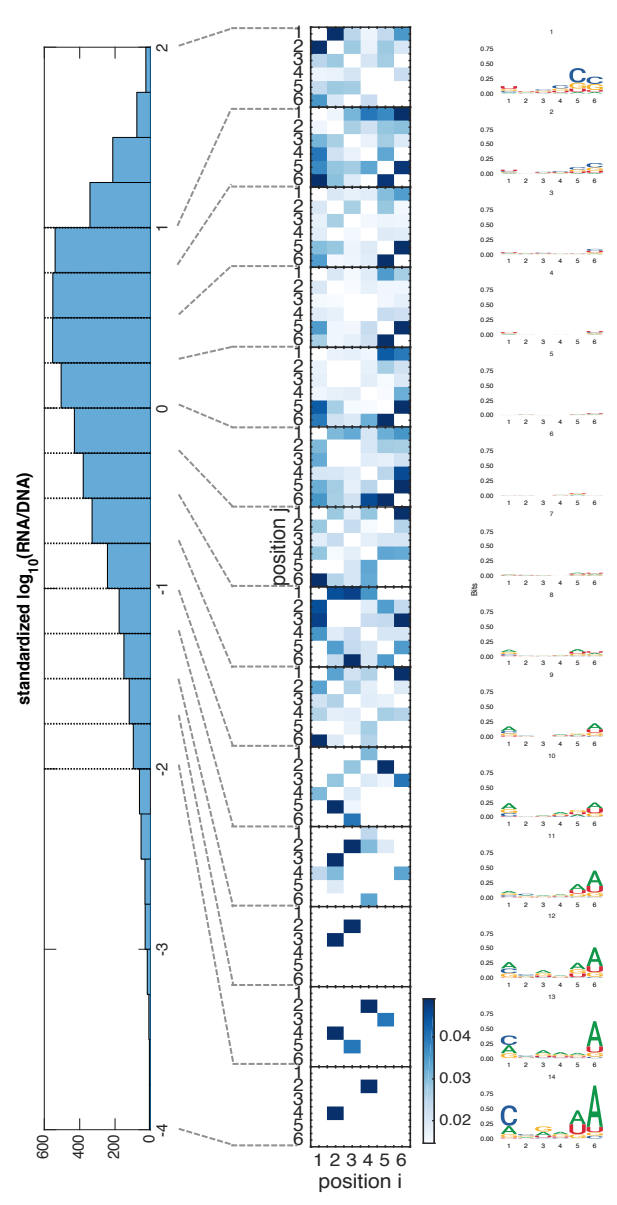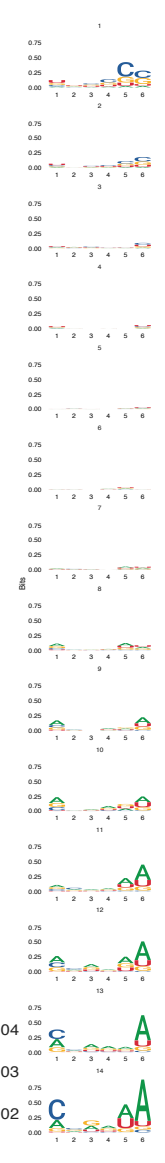

e.

### Cyclic di-GMP-I

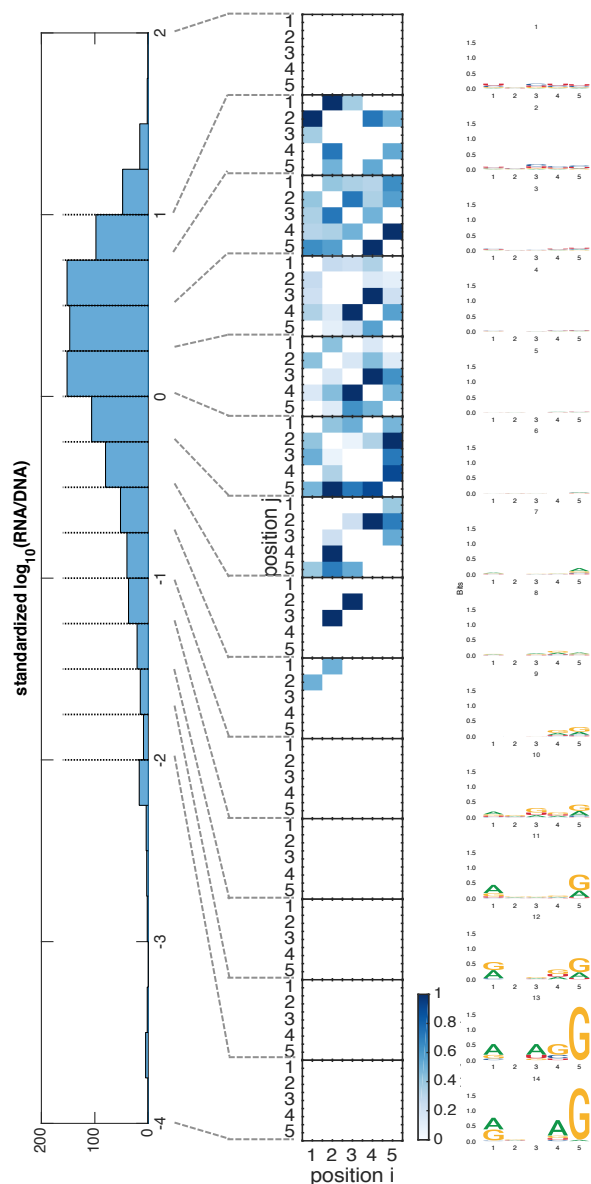

**Supplementary Figure 17. Sequence and structural motifs of sequences in activity bins from histograms of standardized, normalized RNA read counts obtained from RNA-seq.** Each ribozyme switch library is divided into 14 activity bins according to different levels of standardized  $\log_{10}(\text{RNA}/\text{DNA})$ . For sequences in each bin, mutual information analysis is indicated for a pair of nucleotides in loop II in the heat map, and the sequence logo of the sequences in the same bin is shown to the right. The results of this analysis are shown for the (a) theophylline N4-5, (b) xanthine N5-6, (c) folinic acid N5-6, (d) cyclic di-GMP-II N5-6, and (e) cyclic di-GMP-I N5 ribozyme switch libraries.

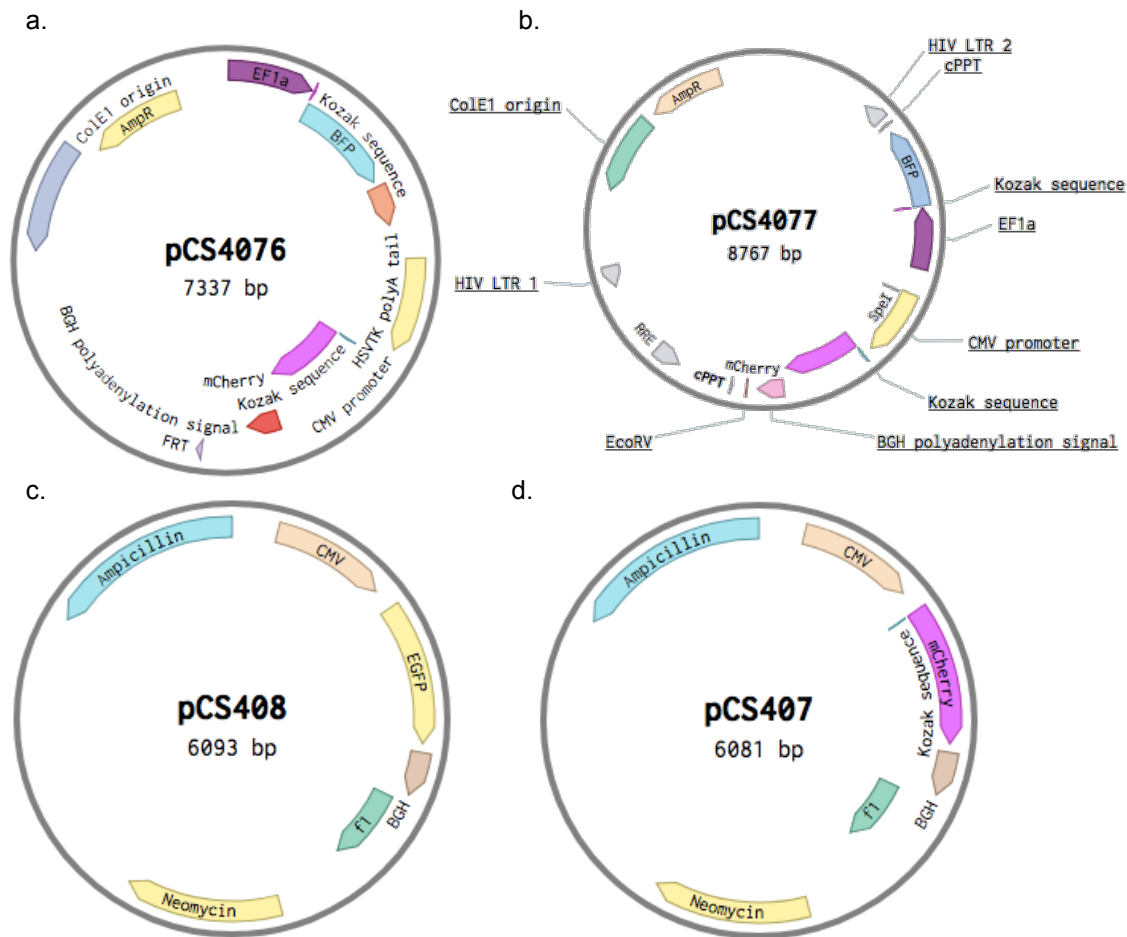

**Supplementary Figure 18. Key plasmid maps for experiments described in this work.** (a) pCS4076 is used for transient transfection and RNA-seq experiments. (b) pCS4077 is used for lentiviral library transduction experiments. (c) pCS408 is used for folinic acid ribozyme switch RNA-seq library experiments and transient co-transfection experiments with pCS407. (d) pCS407 is used as a transfection control with pCS408 in co-transfection experiments. Ribozyme switches and control ribozymes are inserted into pCS4076, pCS4077, and pCS408 right after the stop codon for the fluorescent reporter (mCherry, mCherry, and EGFP, respectively), and before the start of the polyA sequence.



1. Enrich for transduced

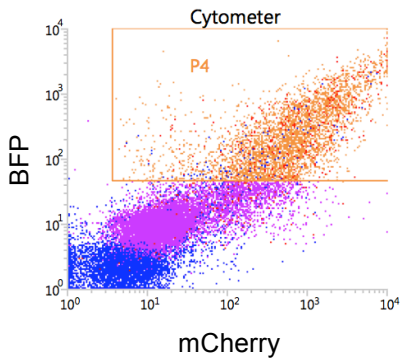

2. Enrich for fast-cleaving sequences

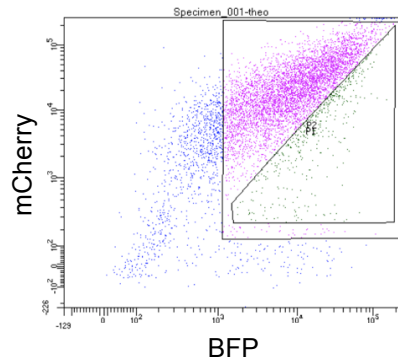

3. 6-way binning sort

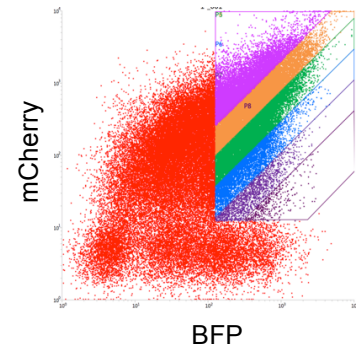

**Supplementary Figure 19. Example sort plots showing the three stages of enrichment for the ribozyme switch libraries.** 1) ~10-20% of the transduced library is sorted (orange gate); 2) ~10% of the fast-cleaving sequences are enriched (green gate); and 3) the final 6-way binning sort (non-red gates) performed on the BD Influx FACS sorter.

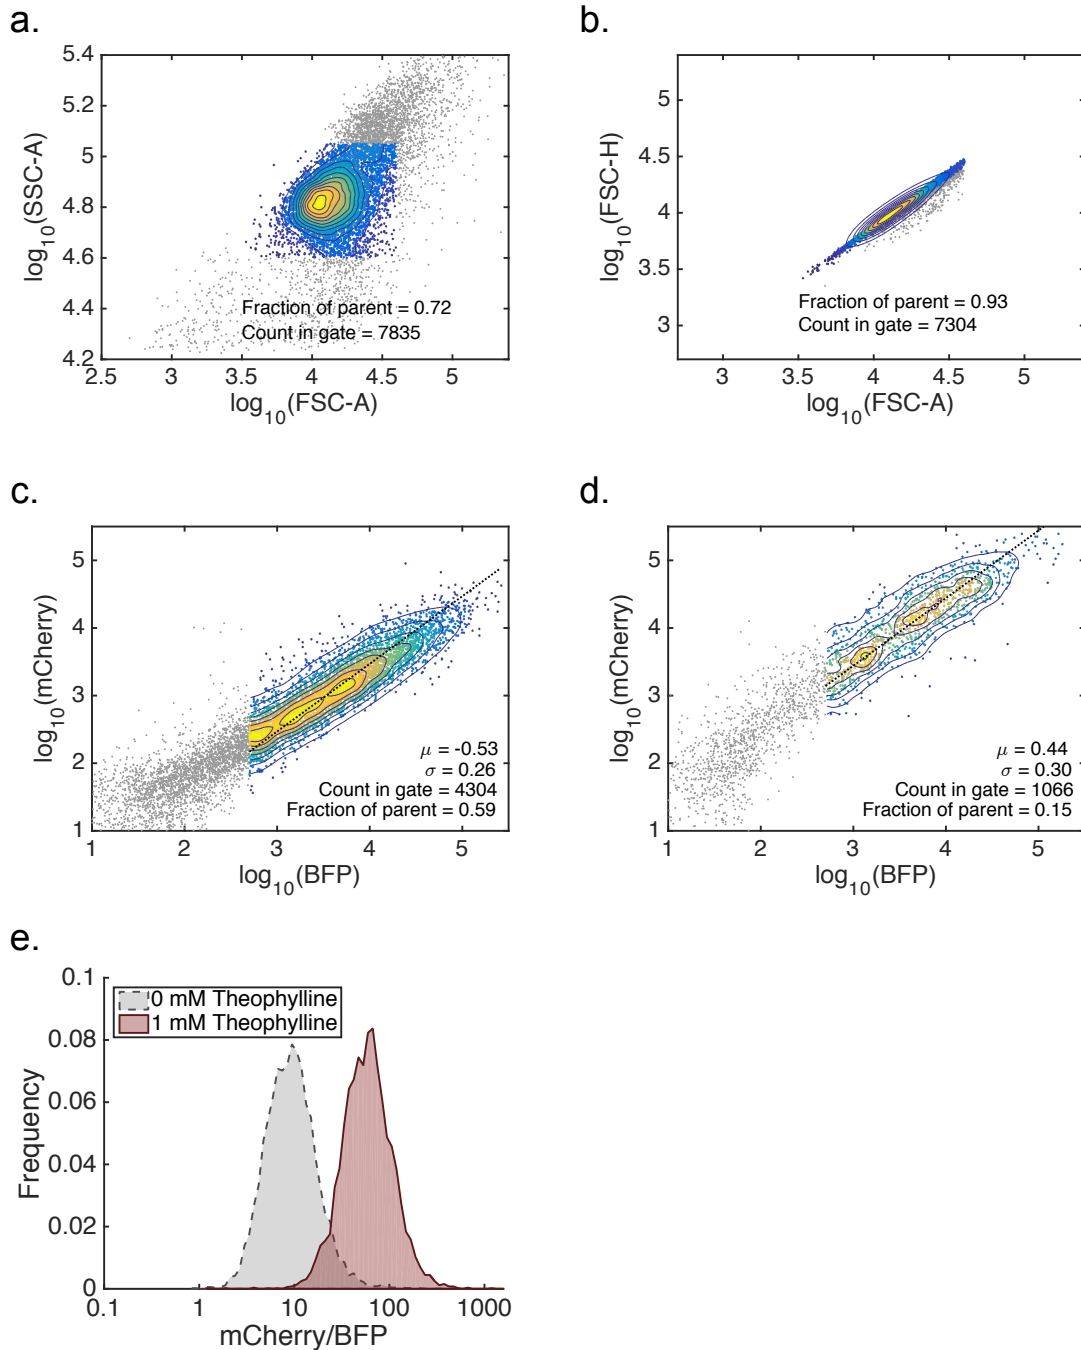

**Supplementary Figure 20. Representative density-contour plots of flow cytometry data for a theophylline ribozyme switch (TheoAAAAA).**

(a) Side scatter area (SSC-A) plotted against forward scatter area (FSC-A) for the starting population of individual flow data events (grey dot); events are gated for viable cells, defined as  $3.5 < \log_{10}(\text{FSC-A}) < 4.6$ , and  $4.6 < \log_{10}(\text{SSC-A}) < 5.05$ , and are represented in the density-contour region.

(b)  $\log_{10}(\text{FSC-H})$  plotted against  $\log_{10}(\text{FSC-A})$  for the viable cells from (a) (grey dot); cells are gated for singlets, defined as  $\log_{10}(\text{FSC-H}) < 0.65 * \log_{10}(\text{FSC-A})$ , and are represented in the density-contour region.

(c) For TheoAAAAA in the 0 mM theophylline condition, fluorescence values  $\log_{10}(\text{mCherry})$  are plotted against  $\log_{10}(\text{BFP})$  for singlet cells (grey dot); cells are gated for transfected, defined as  $\log_{10}(\text{BFP}) > 2.7$ , and are represented in the density-contour region.  $\log_{10}(\text{mCherry}/\text{BFP})$  is fit to a Gaussian distribution, with mean  $\mu$  and standard deviation  $\sigma$  of the transfected cells as indicated.

(d) Same as (c), except the plot shows data for TheoAAAAA induced with 1 mM theophylline. Cells in density-contour regions are colored blue-green-yellow in increasing density; number of cells and fraction of cells in the parent gate are as indicated.

(e) Overlay of histograms of  $\text{mCherry}/\text{BFP}$  for the cell populations transfected with TheoAAAAA in 0/1 mM theophylline. One-sample Kolmogorov-Smirnov (KS) test performed in MATLAB with significant  $\alpha < 0.01$  confirms the normality assumption of the distribution of  $\log_{10}(\text{mCherry}/\text{BFP})$  for the ribozyme switch, where the KS statistic is  $6.7372 \times 10^{-1}$  for the 0 mM theophylline condition, and is  $3.7357 \times 10^{-1}$  for the 1 mM theophylline condition.

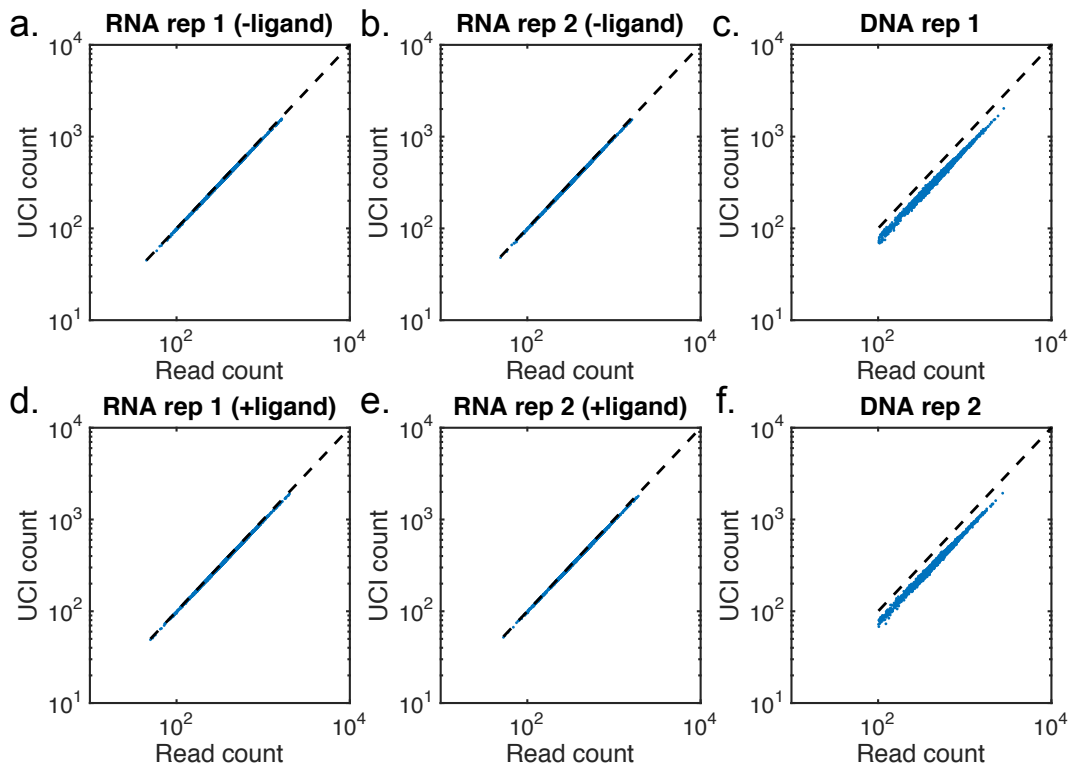

**Supplementary Figure 21. Unique Coverage Index (UCI) versus raw sequencing read count of cyclic di-GMP-II ribozyme switch library members from an RNA-Seq experiment.**

Unique Coverage Index, defined as the unique number of library molecules per sequence. Each dot represents a unique sequence in the library with over 100 read count coverage. Dashed line corresponds to a 1:1 ratio of UCI count versus read count.

- (a) UCI count plotted against raw sequencing read count of the recovered RNA library sequence for replicate 1 of the cyclic di-GMP-II ribozyme switch library in 0 mM ligand.
- (b) UCI count plotted against raw sequencing read count of the recovered RNA library sequence for replicate 2 of the cyclic di-GMP-II ribozyme switch library in 0 mM ligand.
- (c) UCI count plotted against raw sequencing read count of the recovered plasmid DNA library sequence for replicate 1 of the cyclic di-GMP-II ribozyme switch library in 0 mM ligand.
- (d) UCI count plotted against raw sequencing read count of the recovered RNA library sequence for replicate 1 of the cyclic di-GMP-II ribozyme switch library in 1 mM ligand.
- (e) UCI count plotted against raw sequencing read count of the recovered RNA library sequence for replicate 2 of the cyclic di-GMP-II ribozyme switch library in 1 mM ligand.
- (f) UCI count plotted against raw sequencing read count of the recovered plasmid DNA library sequence for replicate 2 of the cyclic di-GMP-II ribozyme switch library in 0 mM ligand.

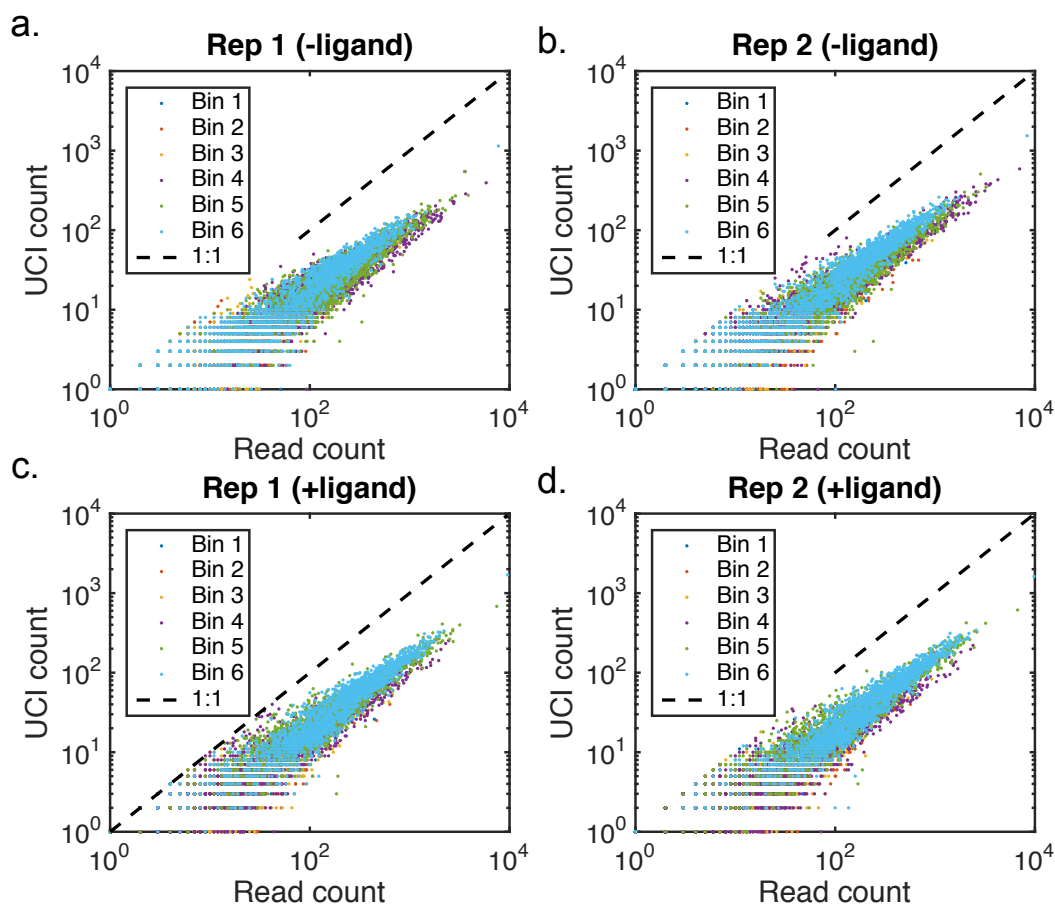

**Supplementary Figure 22. Unique Coverage Index (UCI) versus raw sequencing read count of cyclic di-GMP-II ribozyme switch library members from a FACS-Seq experiment.**

Unique Coverage Index, defined as the unique number of library molecules per sequence. Each dot represents a unique sequence in the library with over 100 read count coverage. Dashed line corresponds to a 1:1 ratio of UCI count versus read count.

(a) UCI count plotted against raw sequencing read count for sequences in each of 6 FACS-sorted bins for replicate 1 of the cyclic di-GMP-II ribozyme switch library in 0 mM ligand.

(b) UCI count plotted against raw sequencing read count for sequences in each of 6 FACS-sorted bins for replicate 2 of the cyclic di-GMP-II ribozyme switch library in 0 mM ligand.

(c) UCI count plotted against raw sequencing read count for sequences in each of 6 FACS-sorted bins for replicate 1 of the cyclic di-GMP-II ribozyme switch library in 1 mM ligand.

(d) UCI count plotted against raw sequencing read count for sequences in each of 6 FACS-sorted bins for replicate 2 of the cyclic di-GMP-II ribozyme switch library in 1 mM ligand.

## Supplementary Tables

Supplementary Table 1. List of DNA sequences for library templates and primers.

| Name                | Description                                                                                        | Sequence (5' → 3')                                                                                                                                                                |
|---------------------|----------------------------------------------------------------------------------------------------|-----------------------------------------------------------------------------------------------------------------------------------------------------------------------------------|
| sTRSVctl_N4         | sTRSVctl non-cleaving library                                                                      | AAACAAACAAA GCTGTCACCGGA<br>TGTGCTT TCCGGTACGTGAGGTCC NNNN<br>GGACGAAACAGC<br>AAAAAGAAAAATAAAAA                                                                                   |
| Theo_N4-5           | Theophylline switch library                                                                        | AAACAAACAAAGCTGTCACCGGAATACCA<br>GCATCGTCTTGATGCCCTTGGAAAG<br>TCCGGTCTGATGAGTCC NNNNN(N)<br>GGACGAAACAGC<br>AAAAAGAAAAATAAAAA                                                     |
| Xan_N5-6            | Xanthine switch library                                                                            | AAACAAACAAAGCTGTCACCGGTGTATTA<br>CCCTAGTGGTTCG ACCGGTCTGATGAGTCC<br>NNNNN(N)<br>GGACGAAACAGCAAAAAGAAAAATAAAAA<br>A                                                                |
| cdiGMPI_N5          | cyclic di-GMP-I switch library                                                                     | AAACAAACAAAGCTGTCACCGCGCACAGG<br>GCAAACCATTCGAAAGAGTGGGACGCAA<br>AGCTCCGGCCTAAACCAGAAGACATGGT<br>AGGTAGCGGGGTTAC<br>CGCGGTCTGATGAGTCC NNNNN<br>GGACGAAACAGCAAAAAGAAAAATAAAAA<br>A |
| cdiGMPII_N5-6       | cyclic di-GMP-II switch library                                                                    | AAACAAACAAA<br>GCTGTCACCGAGAACTGTGAAGTATATC<br>TTAAACCTGGGCACTTAAAAGATATATGG<br>AGTTAGTAGTGCAACCTG<br>CTCGGTCTGATGAGTCC NNNNN(N)<br>GGACGAAACAGC<br>AAAAAGAAAAATAAAAA             |
| FA_GTCTN5-6         | Folinic acid switch library                                                                        | AAACAAACAAA<br>GCTGTCACCGGTGCTTGGTACGTTATATTC<br>A GCCGGTCTGATGAGTCT NNNNN(N)<br>AGACGAAACAGC<br>AAAAAGAAAAATAAAAA                                                                |
| pCS4076-N6 ACCG FWD | Forward primer with N6 UCI (unique coverage index) to PCR library for Gibson assembly into pCS4076 | TAACTGATCATAAATATAGGGCCCGGATC<br>C NNNNNN AAACAAACAAAGCTGTCACCG                                                                                                                   |
| pCS4076-N6 GTC REV  | Reverse primer with N6 UCI to PCR library for Gibson assembly into                                 | AGGCTGATCAGCGGGTTTGGATCC<br>NNNNNN<br>TTTTTATTTTCTTTTGCTGTTTCGTC                                                                                                                  |

|                         |                                                                            |                                                                     |
|-------------------------|----------------------------------------------------------------------------|---------------------------------------------------------------------|
|                         | pCS4076                                                                    |                                                                     |
| pCS4077-<br>N4 ACCG FWD | Forward primer with N4 UCI to PCR library for Gibson assembly into pCS4077 | AGCTGTACAAGTAACTGATCATAAGGATC<br>C NNNN AAACAAACAAAGCTGTCACCGG      |
| pCS4077-<br>N4_GTC_REV  | Reverse primer with N4 UCI to PCR library for Gibson assembly into pCS4077 | AACTAGAAGGCACAGTCGAGGTCTAGA<br>NNNN<br>TTTTTATTTTTCTTTTTGCTGTTTCGTC |
| pCS408-<br>ACCG_FWD     | Forward primer to PCR library for Gibson assembly into pCS408              | GCATGGACGAGCTGTACAAGTAACTCGAG<br>AAACAAACAAAGCTGTCACCG              |
| pCS408-GTC_REV          | Reverse primer to PCR library for Gibson assembly into pCS408              | AGCGGGTTTAAACGGGCCCTCTAGA<br>TTTTTATTTTTCTTTTTGCTGTTTCGTC           |

N refers to degenerate bases with 25% representation of each of the bases, A, T, C, and G. Parenthesis around N, e.g., NNNN(N), refer to an additional base in the library, that is the library consists of both NNNN and NNNNN.

Supplementary Table 2. List of control ribozymes and individual ribozyme switch sequences.

| Name       | Description                  | Sequence (5' → 3')                                                                        |
|------------|------------------------------|-------------------------------------------------------------------------------------------|
| sTRSV      | Control (wild-type) ribozyme | GCUGUCACCGGA UGUGCUU<br>UCCGGUCUGAUGAGUCC GUGA<br>GGACGAAACAGC                            |
| sTRSVctl   | Control ribozyme             | GCUGUCACCGGA UGUGCUU<br>UCCGGUACGUGAGGUCC GUGA<br>GGACGAAACAGC                            |
| g814       | Control ribozyme             | GCUGUCACCGGA UGUU UCCGGUCUGAUGAGUCC<br>AUAA GGACGAAACAGC                                  |
| g833       | Control ribozyme             | GCUGUCACCGGA UACU UCCGGUCUGAUGAGUCC<br>CAGA GGACGAAACAGC                                  |
| g862       | Control ribozyme             | GCUGUCACCGGA UGCA UCCGGUCUGAUGAGUCC<br>CGCG GGACGAAACAGC                                  |
| Theo-AAAAA | Theophylline switch          | GCUGUCACCGGA<br>AUACCAGCAUCGUCUUGAUGCCCUUGGAAG<br>UCCGGUCUGAUGAGUCC AAAAA<br>GGACGAAACAGC |
| Theo-CAGAA | Theophylline switch          | GCUGUCACCGGA<br>AUACCAGCAUCGUCUUGAUGCCCUUGGAAG<br>UCCGGUCUGAUGAGUCC CAGAA<br>GGACGAAACAGC |
| Theo-AGAAA | Theophylline switch          | GCUGUCACCGGA<br>AUACCAGCAUCGUCUUGAUGCCCUUGGAAG<br>UCCGGUCUGAUGAGUCC AGAAA                 |

|            |                     |                                                                                           |
|------------|---------------------|-------------------------------------------------------------------------------------------|
|            |                     | GGACGAAACAGC                                                                              |
| Theo-AGGAA | Theophylline switch | GCUGUCACCGGA<br>AUACCAGCAUCGUCUUGAUGCCCUUGGAAG<br>UCCGGUCUGAUGAGUCC AGGAA<br>GGACGAAACAGC |
| Theo-CAUAA | Theophylline switch | GCUGUCACCGGA<br>AUACCAGCAUCGUCUUGAUGCCCUUGGAAG<br>UCCGGUCUGAUGAGUCC CAUAA<br>GGACGAAACAGC |
| Theo-CUGAA | Theophylline switch | GCUGUCACCGGA<br>AUACCAGCAUCGUCUUGAUGCCCUUGGAAG<br>UCCGGUCUGAUGAGUCC CUGAA<br>GGACGAAACAGC |
| Theo-CUUGA | Theophylline switch | GCUGUCACCGGA<br>AUACCAGCAUCGUCUUGAUGCCCUUGGAAG<br>UCCGGUCUGAUGAGUCC CUUGA<br>GGACGAAACAGC |
| Theo-UGGUA | Theophylline switch | GCUGUCACCGGA<br>AUACCAGCAUCGUCUUGAUGCCCUUGGAAG<br>UCCGGUCUGAUGAGUCC UGGUA<br>GGACGAAACAGC |
| Theo-CGGCA | Theophylline switch | GCUGUCACCGGA<br>AUACCAGCAUCGUCUUGAUGCCCUUGGAAG<br>UCCGGUCUGAUGAGUCC CGGCA<br>GGACGAAACAGC |
| Theo-GAAAG | Theophylline switch | GCUGUCACCGGA<br>AUACCAGCAUCGUCUUGAUGCCCUUGGAAG<br>UCCGGUCUGAUGAGUCC GAAAG<br>GGACGAAACAGC |
| Theo-AUUCA | Theophylline switch | GCUGUCACCGGA<br>AUACCAGCAUCGUCUUGAUGCCCUUGGAAG<br>UCCGGUCUGAUGAGUCC AUUCA<br>GGACGAAACAGC |
| Theo-AAAGA | Theophylline switch | GCUGUCACCGGA<br>AUACCAGCAUCGUCUUGAUGCCCUUGGAAG<br>UCCGGUCUGAUGAGUCC AAAGA<br>GGACGAAACAGC |
| Xan-AAGAAG | Xanthine switch     | GCUGUCACCGG U GUAUUACCCUAGUGGUCG A<br>CCGGUCUGAUGAGUCU AAGAAG<br>AGACGAAACAGC             |
| Xan-ACGAAG | Xanthine switch     | GCUGUCACCGG U GUAUUACCCUAGUGGUCG A<br>CCGGUCUGAUGAGUCU ACGAAG<br>AGACGAAACAGC             |
| Xan-ACGAG  | Xanthine switch     | GCUGUCACCGG U GUAUUACCCUAGUGGUCG A<br>CCGGUCUGAUGAGUCU ACGAG<br>AGACGAAACAGC              |
| Xan-GAGAAG | Xanthine switch     | GCUGUCACCGG U GUAUUACCCUAGUGGUCG A<br>CCGGUCUGAUGAGUCU GAGAAG                             |



|              |                     |                                                                                                                                     |
|--------------|---------------------|-------------------------------------------------------------------------------------------------------------------------------------|
|              |                     | AGACGAAACAGC                                                                                                                        |
| Xan-GCGAG    | Xanthine switch     | GCUGUCACCGG U GUAUUACCCUAGUGGGUCG A<br>CCGGUCUGAUGAGUCU GCGAG<br>AGACGAAACAGC                                                       |
| Xan-AAGACG   | Xanthine switch     | GCUGUCACCGG U GUAUUACCCUAGUGGGUCG A<br>CCGGUCUGAUGAGUCU AAGACG<br>AGACGAAACAGC                                                      |
| Xan-GCGUAA   | Xanthine switch     | GCUGUCACCGG U GUAUUACCCUAGUGGGUCG A<br>CCGGUCUGAUGAGUCU GCGUAA<br>AGACGAAACAGC                                                      |
| Xan-GAGUG    | Xanthine switch     | GCUGUCACCGG U GUAUUACCCUAGUGGGUCG A<br>CCGGUCUGAUGAGUCCU GAGUG<br>AGACGAAACAGC                                                      |
| cdGII-CCAAUG | c-di-GMP-II switch  | GCUGUCACCG AG<br>AAACUGUGAAGUAUAUCUAAAACCUGGGGCACUU<br>AAAAGAUUAUUGGAGUUAGUAGUGCAACCUG<br>CU CGGUCUGAUGAGUCC CCAAUG<br>GGACGAAACAGC |
| cdGII-CGGAA  | c-di-GMP-II switch  | GCUGUCACCG AG<br>AAACUGUGAAGUAUAUCUAAAACCUGGGGCACUU<br>AAAAGAUUAUUGGAGUUAGUAGUGCAACCUG<br>CU CGGUCUGAUGAGUCC CGGAA<br>GGACGAAACAGC  |
| cdGII-CGUAA  | c-di-GMP-II switch  | GCUGUCACCG AG<br>AAACUGUGAAGUAUAUCUAAAACCUGGGGCACUU<br>AAAAGAUUAUUGGAGUUAGUAGUGCAACCUG<br>CU CGGUCUGAUGAGUCC CGUAA<br>GGACGAAACAGC  |
| cdGII-CGUGAA | c-di-GMP-II switch  | GCUGUCACCG AG<br>AAACUGUGAAGUAUAUCUAAAACCUGGGGCACUU<br>AAAAGAUUAUUGGAGUUAGUAGUGCAACCUG<br>CU CGGUCUGAUGAGUCC CGUGAA<br>GGACGAAACAGC |
| Fol-AUAGAG   | Folinic acid switch | GCUGUCACCGG U GCUUGGUACGUUAUAUUCA G<br>CCGGUCUGAUGAGUCU AUAGAG<br>AGACGAAACAGC                                                      |
| Fol-UAAGG    | Folinic acid switch | GCUGUCACCGG U GCUUGGUACGUUAUAUUCA G<br>CCGGUCUGAUGAGUCU UAAGG<br>AGACGAAACAGC                                                       |
| Fol-UGAGG    | Folinic acid switch | GCUGUCACCGG U GCUUGGUACGUUAUAUUCA G<br>CCGGUCUGAUGAGUCU UGAGG<br>AGACGAAACAGC                                                       |
| Fol-UGAUG    | Folinic acid switch | GCUGUCACCGG U GCUUGGUACGUUAUAUUCA G<br>CCGGUCUGAUGAGUCU UGAUG<br>AGACGAAACAGC                                                       |
| Fol-UGGAG    | Folinic acid switch | GCUGUCACCGG U GCUUGGUACGUUAUAUUCA G<br>CCGGUCUGAUGAGUCU UGGAG<br>AGACGAAACAGC                                                       |

|           |                     |                                                                               |
|-----------|---------------------|-------------------------------------------------------------------------------|
| Fol-UGAAG | Folinic acid switch | GCUGUCACCGG U GCUUGGUACGUUAUAUUCA G<br>CCGGUCUGAUGAGUCU UGAAG<br>AGACGAAACAGC |
|-----------|---------------------|-------------------------------------------------------------------------------|

Supplementary Table 3. RNA-Seq results statistics.

| Library                   | Theophylline | Xanthine | Folinic acid | Folinic acid | Cyclic di-GMP-I | Cyclic di-GMP-II |
|---------------------------|--------------|----------|--------------|--------------|-----------------|------------------|
| Loop II                   | N4-5         | N5-6     | N5-6         | N5-6         | N5              | N5-6             |
| Gene regulated            | mCherry      | mCherry  | GFP          | mCherry      | mCherry         | mCherry          |
| Ligand conc (mM)          | 5            | 5        | 6            | 6            | 1               | 1                |
| No. sequenced             | 1280         | 5120     | 5120         | 5120         | 1024            | 5120             |
| No. >100 reads            | 665          | 5073     | 5114         | 5118         | 1011            | 4966             |
| R <sup>2</sup> replicates | 0.80         | 0.92     | 0.89         | 0.89         | 0.83            | 0.85             |
| No. >2 fold AR*           | 148          | 1279     | 510          | 49           | 0               | 113              |
| Max. AR*                  | 6.8          | 5.6      | 4.9          | 2.7          | 1.9             | 2.6              |

\* AR, activation ratio

Supplementary Table 4. FACS-Seq results statistics.

| Library                      | Theophylline | Xanthine | Folinic acid | Cyclic di-GMP-II |
|------------------------------|--------------|----------|--------------|------------------|
| Loop II                      | N4-5         | N5-6     | N5-6         | N5-6             |
| Gene regulated               | mCherry      | mCherry  | mCherry      | mCherry          |
| Ligand conc (mM)             | 1            | 5        | 6            | 1                |
| No. sequenced                | 1280         | 5117     | 5102         | 5100             |
| No. >100 reads               | 1202         | 2632     | 2221         | 1969             |
| R <sup>2</sup> replicates    | 0.89         | 0.93     | 0.66         | 0.90             |
| No. >2 fold AR* and p<1e-125 | 19           | 203      | 15           | 38               |
| Max AR*                      | 3.8          | 5.0      | 4.5          | 2.4              |

\* AR, activation ratio

Supplementary Table 5. List of primers used in reverse transcription and barcoding for multiplexed sequencing.

| Name                                     | Sequence (5' → 3')                                                                           |
|------------------------------------------|----------------------------------------------------------------------------------------------|
| RT1 (Reverse transcription primer 1)     | AGGCTGATCAGCGGGTTTGGTACC NNNNNN<br>TTTTTATTTTTCTTTTTGCTGTTTCGTC                              |
| RT2 (Reverse transcription primer 2)     | GCGATGCAATTTCTCATT                                                                           |
| Outer_REV (Outer PCR primer for DNA-seq) | GCGATGCAATTTCTCATT                                                                           |
| mCherry_fwd (outer PCR primer)           | CACCATCGTGGAACAGTACG                                                                         |
| EGFP_fwd (outer PCR primer)              | CGACAACCACTACCTGAGCA                                                                         |
| Illumina i5 forward primer               | AATGATACGGCGACCACCGA                                                                         |
| Illumina i7 reverse primer               | CAAGCAGAAGACGGCATAACGAGAT                                                                    |
| Barcode primers for pCS4076              |                                                                                              |
| pCS4076-PE1 null FWD                     | AATGATACGGCGACCACCGA<br>GATCTACTCTTTCCCTACACGACGCTCTTCCGAT<br>CT AATATAGGGCCCGGATCC          |
| pCS4076-PE1 C FWD                        | AATGATACGGCGACCACCGA<br>GATCTACTCTTTCCCTACACGACGCTCTTCCGAT<br>CT C AATATAGGGCCCGGATCC        |
| pCS4076-PE1 GC FWD                       | AATGATACGGCGACCACCGA<br>GATCTACTCTTTCCCTACACGACGCTCTTCCGAT<br>CT GC AATATAGGGCCCGGATCC       |
| pCS4076-PE1 ACC FWD                      | AATGATACGGCGACCACCGA<br>GATCTACTCTTTCCCTACACGACGCTCTTCCGAT<br>CT ACC AATATAGGGCCCGGATCC      |
| pCS4076-PE1 TATA FWD                     | AATGATACGGCGACCACCGA<br>GATCTACTCTTTCCCTACACGACGCTCTTCCGAT<br>CT TATA AATATAGGGCCCGGATCC     |
| pCS4076-PE1 GACTC FWD                    | AATGATACGGCGACCACCGA<br>GATCTACTCTTTCCCTACACGACGCTCTTCCGAT<br>CT GACTC AATATAGGGCCCGGATCC    |
| pCS4076-PE1 CGCGAT FWD                   | AATGATACGGCGACCACCGA<br>GATCTACTCTTTCCCTACACGACGCTCTTCCGAT<br>CT CGCGAT AATATAGGGCCCGGATCC   |
| pCS4076-PE1 CAGAAGA FWD                  | AATGATACGGCGACCACCGA<br>GATCTACTCTTTCCCTACACGACGCTCTTCCGAT<br>CT CAGAAGA AATATAGGGCCCGGATCC  |
| pCS4076-PE1 ATGAGACC FWD                 | AATGATACGGCGACCACCGA<br>GATCTACTCTTTCCCTACACGACGCTCTTCCGAT<br>CT ATGAGACC AATATAGGGCCCGGATCC |

|                                 |                                                                                                     |
|---------------------------------|-----------------------------------------------------------------------------------------------------|
| pCS4076-PE1_TCA_FWD             | AATGATACGGCGACCACCGA<br>GATCTACTCTTTCCCTACACGACGCTCTTCCGAT<br>CT TCA AATATAGGGCCCGGATCC             |
| pCS4076-PE1_CGGC_FWD            | AATGATACGGCGACCACCGA<br>GATCTACTCTTTCCCTACACGACGCTCTTCCGAT<br>CT CGGC AATATAGGGCCCGGATCC            |
| pCS4076-PE1_AAGAG_FWD           | AATGATACGGCGACCACCGA<br>GATCTACTCTTTCCCTACACGACGCTCTTCCGAT<br>CT AAGAG AATATAGGGCCCGGATCC           |
| pCS4076-null_PM2_I1_REV         | CAAGCAGAAGACGGCATAACGAGATCGTGAT<br>GTGACTGGAGTTCAGACGTGTGCTCTT<br>CCGATCT TCAGCGGGTTTGGTACC         |
| pCS4076-A_PM2_I2_REV            | CAAGCAGAAGACGGCATAACGAGATACATCG<br>GTGACTGGAGTTCAGACGTGTGCTCTT CCGATCT A<br>TCAGCGGGTTTGGTACC       |
| pCS4076-TT_PM2_I3_REV           | CAAGCAGAAGACGGCATAACGAGATGCCTAA<br>GTGACTGGAGTTCAGACGTGTGCTCTT CCGATCT TT<br>TCAGCGGGTTTGGTACC      |
| pCS4076-TCC_PM2_I4_REV          | CAAGCAGAAGACGGCATAACGAGAT TGGTCA<br>GTGACTGGAGTTCAGACGTGTGCTCTT CCGATCT<br>TCC TCAGCGGGTTTGGTACC    |
| pCS4076-<br>GATA_PM2_I6_REV     | CAAGCAGAAGACGGCATAACGAGAT ATTGGC<br>GTGACTGGAGTTCAGACGTGTGCTCTT CCGATCT<br>GATA TCAGCGGGTTTGGTACC   |
| pCS4076-<br>TGTGT_PM2_I7_REV    | CAAGCAGAAGACGGCATAACGAGAT GATCTG<br>GTGACTGGAGTTCAGACGTGTGCTCTT CCGATCT<br>TGTGT TCAGCGGGTTTGGTACC  |
| pCS4076-<br>ATATTG_PM2_I8_REV   | CAAGCAGAAGACGGCATAACGAGAT<br>ACTTGAGTACTGGAGTTCAGACGTGTGCTCTTC<br>CGATCT AGCATG TCAGCGGGTTTGGTACC   |
| pCS4076-<br>CGATCCA_PM2_I9_REV  | CAAGCAGAAGACGGCATAACGAGAT<br>GATCAGGTGACTGGAGTTCAGACGTGTGCTCTTC<br>CGATCT CTGACCA TCAGCGGGTTTGGTACC |
| pCS4076-<br>GCATGTTT_PM2_I5_REV | CAAGCAGAAGACGGCATAACGAGAT<br>ACAGTGGTACTGGAGTTCAGACGTGTGCTCTTC<br>CGATCT GCATGTTT TCAGCGGGTTTGGTACC |
| Barcode primers for pCS4077     |                                                                                                     |
| pCS4077-PE1_null_FWD            | AATGATACGGCGACCACCGAGATCTACTCTTTCC<br>CTACACGACGCTCTTCCGATCT<br>GTACAAGTAACTGATCATAAGGATCC          |
| pCS4077-PE1_C_FWD               | AATGATACGGCGACCACCGAGATCTACTCTTTCC<br>CTACACGACGCTCTTCCGATCT C<br>GTACAAGTAACTGATCATAAGGATCC        |
| pCS4077-PE1_GC_FWD              | AATGATACGGCGACCACCGAGATCTACTCTTTCC<br>CTACACGACGCTCTTCCGATCT GC<br>GTACAAGTAACTGATCATAAGGATCC       |

|                             |                                                                                                       |
|-----------------------------|-------------------------------------------------------------------------------------------------------|
| pCS4077-PE1_ACC_FWD         | AATGATACGGCGACCACCGAGATCTACACTCTTTCC<br>CTACACGACGCTCTTCCGATCT ACC<br>GTACAAGTAACTGATCATAAGGATCC      |
| pCS4077-PE1_TATA_FWD        | AATGATACGGCGACCACCGAGATCTACACTCTTTCC<br>CTACACGACGCTCTTCCGATCT TATA<br>GTACAAGTAACTGATCATAAGGATCC     |
| pCS4077-PE1_GACTC_FWD       | AATGATACGGCGACCACCGAGATCTACACTCTTTCC<br>CTACACGACGCTCTTCCGATCT GACTC<br>GTACAAGTAACTGATCATAAGGATCC    |
| pCS4077-PE1_CGCGAT_FWD      | AATGATACGGCGACCACCGAGATCTACACTCTTTCC<br>CTACACGACGCTCTTCCGATCT CGCGAT<br>ACAAGTAACTGATCATAAGGATCC     |
| pCS4077-PE1_CAGAAGA_FWD     | AATGATACGGCGACCACCGAGATCTACACTCTTTCC<br>CTACACGACGCTCTTCCGATCT CAGAAGA<br>ACAAGTAACTGATCATAAGGATCC    |
| pCS4077-PE1_ATGAGACC_FWD    | AATGATACGGCGACCACCGAGATCTACACTCTTTCC<br>CTACACGACGCTCTTCCGATCT ATGAGACC<br>ACAAGTAACTGATCATAAGGATCC   |
| pCS4077-null_PM2_I1_REV     | CAAGCAGAAGACGGCATAACGAGAT<br>CGTGATGTGACTGGAGTTCAGACGTGTGCTCTTC<br>CGATCT GGCACAGTCGAGGTCTAGA         |
| pCS4077-A_PM2_I2_REV        | CAAGCAGAAGACGGCATAACGAGAT<br>ACATCGGTGACTGGAGTTCAGACGTGTGCTCTTC<br>CGATCT A GGCACAGTCGAGGTCTAGA       |
| pCS4077-TT_PM2_I3_REV       | CAAGCAGAAGACGGCATAACGAGAT<br>GCCTAAGTGACTGGAGTTCAGACGTGTGCTCTTC<br>CGATCT TT GGCACAGTCGAGGTCTAGA      |
| pCS4077-TCC_PM2_I4_REV      | CAAGCAGAAGACGGCATAACGAGAT<br>TGGTCAGTGACTGGAGTTCAGACGTGTGCTCTTC<br>CGATCT TCC GGCACAGTCGAGGTCTAGA     |
| pCS4077-GATA_PM2_I6_REV     | CAAGCAGAAGACGGCATAACGAGAT<br>ATTGGCGTGACTGGAGTTCAGACGTGTGCTCTTC<br>CGATCT GATA GGCACAGTCGAGGTCTAGA    |
| pCS4077-TGTGT_PM2_I7_REV    | CAAGCAGAAGACGGCATAACGAGAT<br>GATCTGGTGACTGGAGTTCAGACGTGTGCTCTTC<br>CGATCT TGTGT GGCACAGTCGAGGTCTAGA   |
| pCS4077-ATATTG_PM2_I8_REV   | CAAGCAGAAGACGGCATAACGAGAT<br>ACTTGAGTGACTGGAGTTCAGACGTGTGCTCTTC<br>CGATCT AGCATG GCACAGTCGAGGTCTAGA   |
| pCS4077-CGATCCA_PM2_I9_REV  | CAAGCAGAAGACGGCATAACGAGAT<br>GATCAGGTGACTGGAGTTCAGACGTGTGCTCTTC<br>CGATCT CTGACCA GCACAGTCGAGGTCTAGA  |
| pCS4077-GCATGTTT_PM2_I5_REV | CAAGCAGAAGACGGCATAACGAGAT<br>ACAGTGGTGACTGGAGTTCAGACGTGTGCTCTTC<br>CGATCT GCATGTTT GCACAGTCGAGGTCTAGA |
| Barcode primers for pCS408  |                                                                                                       |

|                             |                                                                                                       |
|-----------------------------|-------------------------------------------------------------------------------------------------------|
| pCS408-PE1 null FWD         | AATGATACGGCGACCACCGA<br>GATCTACTCTTTCCCTACACGACGCTCTTCCGAT<br>CT CGAGCTGTACAAGTAACTCGAG               |
| pCS408-PE1 T FWD            | AATGATACGGCGACCACCGA<br>GATCTACTCTTTCCCTACACGACGCTCTTCCGAT<br>CT T CGAGCTGTACAAGTAACTCGAG             |
| pCS408-PE1 GC FWD           | AATGATACGGCGACCACCGA<br>GATCTACTCTTTCCCTACACGACGCTCTTCCGAT<br>CT GC CGAGCTGTACAAGTAACTCGAG            |
| pCS408-PE1 ACC FWD          | AATGATACGGCGACCACCGA<br>GATCTACTCTTTCCCTACACGACGCTCTTCCGAT<br>CT ACC CGAGCTGTACAAGTAACTCGAG           |
| pCS408-PE1 TATA FWD         | AATGATACGGCGACCACCGA<br>GATCTACTCTTTCCCTACACGACGCTCTTCCGAT<br>CT TATA CGAGCTGTACAAGTAACTCGAG          |
| pCS408-PE1 GACTC FWD        | AATGATACGGCGACCACCGA<br>GATCTACTCTTTCCCTACACGACGCTCTTCCGAT<br>CT GACTC CGAGCTGTACAAGTAACTCGAG         |
| pCS408-PE1 TCA FWD          | AATGATACGGCGACCACCGA<br>GATCTACTCTTTCCCTACACGACGCTCTTCCGAT<br>CT TCA CGAGCTGTACAAGTAACTCGAG           |
| pCS408-null PM2 I1 REV      | CAAGCAGAAGACGGCATAACGAGAT CGTGAT<br>GTGACTGGAGTTCAGACGTGTGCTCTT<br>CCGATCT GTTTAAACGGGCCCTCTAGA       |
| pCS408-A PM2 I2 REV         | CAAGCAGAAGACGGCATAACGAGAT ACATCG<br>GTGACTGGAGTTCAGACGTGTGCTCTT<br>CCGATCT A GTTTAAACGGGCCCTCTAGA     |
| pCS408-TT PM2 I3 REV        | CAAGCAGAAGACGGCATAACGAGAT GCCTAA<br>GTGACTGGAGTTCAGACGTGTGCTCTT<br>CCGATCT TT GTTTAAACGGGCCCTCTAGA    |
| pCS408-TCC PM2 I4 REV       | CAAGCAGAAGACGGCATAACGAGAT TGGTCA<br>GTGACTGGAGTTCAGACGTGTGCTCTT<br>CCGATCT TCC GTTTAAACGGGCCCTCTAGA   |
| pCS408-GATA PM2 I6 REV      | CAAGCAGAAGACGGCATAACGAGAT ATTGGC<br>GTGACTGGAGTTCAGACGTGTGCTCTT<br>CCGATCT GATA GTTTAAACGGGCCCTCTAGA  |
| pCS408-<br>TGTGT PM2 I7 REV | CAAGCAGAAGACGGCATAACGAGAT GATCTG<br>GTGACTGGAGTTCAGACGTGTGCTCTT<br>CCGATCT TGTGT GTTTAAACGGGCCCTCTAGA |

Supplementary Table 6. Lentivirus transduction experiment scale for FACS-Seq.

| Library                              | Theophylline | Xanthine   | Xanthine  | Cyclic di-GMP-II | Cyclic di-GMP-II | Folinic acid | Folinic acid |
|--------------------------------------|--------------|------------|-----------|------------------|------------------|--------------|--------------|
| <b>Loop II</b>                       | N4-5         | N5         | N6        | N5               | N6               | N5           | N6           |
| <b>Diversity</b>                     | 1,280        | 5,120      | 4,096     | 1,024            | 4,096            | 1,024        | 4,096        |
| <b>Coverage</b>                      | 400          | 200        | 200       | 200              | 200              | 200          | 200          |
| <b>Total coverage desired</b>        | 512,000      | 1,024,000  | 819,200   | 204,800          | 819,200          | 204,800      | 819,200      |
| <b>Estimated fraction transduced</b> | 0.1          | 0.1        | 0.1       | 0.1              | 0.1              | 0.1          | 0.1          |
| <b>Cells to be transduced</b>        | 5,120,000    | 10,240,000 | 8,192,000 | 2,048,000        | 8,192,000        | 2,048,000    | 8,192,000    |
| <b>Cell density per 10 cm dish</b>   | 3,480,000    | 3,480,000  | 3,480,000 | 3,480,000        | 3,480,000        | 3,480,000    | 3,480,000    |
| <b>No. of 10 cm dishes desired</b>   | 1.5          | 2.9        | 2.4       | 0.6              | 2.4              | 0.6          | 2.4          |
| <b>No. of 10 cm dishes used</b>      | 2            | 3          | 3         | 1                | 3                | 1            | 3            |

Supplementary Table 7. FACS-Seq binning sort cell count.

| Library          | Experiment condition |                  | Number of cells sorted per FACS Gate (P#) |           |           |         |         |        | Total cell count sorted |
|------------------|----------------------|------------------|-------------------------------------------|-----------|-----------|---------|---------|--------|-------------------------|
|                  | Rep                  | Ligand Conc (mM) | P4                                        | P5        | P6        | P7      | P8      | P9     |                         |
| Theophylline     | 1                    | 0                | 249,946                                   | 451,904   | 257,676   | 89,239  | 31,936  | 7,610  | 1,088,311               |
| Theophylline     | 2                    | 0                | 288,793                                   | 390,949   | 259,622   | 99,416  | 33,511  | 5,426  | 1,077,717               |
| Theophylline     | 1                    | 1                | 335,452                                   | 436,197   | 202,463   | 75,533  | 38,997  | 7,776  | 1,096,418               |
| Theophylline     | 2                    | 1                | 352,298                                   | 426,368   | 192,559   | 72,889  | 36,995  | 7,119  | 1,088,228               |
| Xanthine         | 1                    | 0                | 148,143                                   | 811,586   | 1,305,830 | 833,707 | 319,809 | 45,415 | 3,464,490               |
| Xanthine         | 2                    | 0                | 175,600                                   | 881,457   | 1,302,051 | 770,824 | 284,810 | 40,822 | 3,455,564               |
| Xanthine         | 1                    | 5                | 1,199,702                                 | 1,502,041 | 533,039   | 252,287 | 131,738 | 51,265 | 3,670,072               |
| Xanthine         | 2                    | 5                | 1,874,076                                 | 1,501,444 | 548,936   | 264,138 | 152,559 | 67,031 | 4,408,184               |
| cyclic di-GMP-II | 1                    | 0                | 382,763                                   | 481,121   | 312,594   | 91,994  | 32,122  | 8,693  | 1,309,287               |
| cyclic di-GMP-II | 2                    | 0                | 429,470                                   | 481,218   | 288,812   | 83,868  | 29,775  | 7,914  | 1,321,057               |
| cyclic di-GMP-II | 1                    | 1                | 590,158                                   | 368,955   | 152,677   | 48,145  | 21,733  | 6,739  | 1,188,407               |
| cyclic di-GMP-II | 2                    | 1                | 579,887                                   | 343,241   | 142,412   | 45,584  | 21,561  | 6,860  | 1,139,545               |
| Folinic acid     | 1                    | 0                | 504,906                                   | 816,801   | 507,149   | 132,637 | 32,331  | 4,829  | 1,998,653               |
| Folinic acid     | 2                    | 0                | 581,995                                   | 907,121   | 544,072   | 140,717 | 35,277  | 5,191  | 2,214,373               |
| Folinic acid     | 1                    | 6                | 299,412                                   | 794,692   | 767,289   | 222,165 | 55,770  | 7,944  | 2,147,272               |
| Folinic acid     | 2                    | 6                | 251,090                                   | 703,296   | 801,100   | 271,437 | 63,386  | 7,740  | 2,098,049               |

Supplementary Table 8. List of plasmids used in this work.

| Accession | Parent vector | Switch/ribozyme/gene description         |
|-----------|---------------|------------------------------------------|
| pCS4076   | pcDNA5/FRT    | pcDNA5/FRT_CMV-mCherry-BghA_EF1alpha-BFP |
| pCS4077   | pKL5          | pLenti_CMV-mCherry-BghA_EF1alpha-BFP     |
| pCS4078   | pCS4077       | Control ribozyme sTRSV                   |
| pCS4079   | pCS4077       | Control ribozyme sTRSVctl                |
| pCS4080   | pCS4077       | Control ribozyme g814                    |
| pCS4081   | pCS4077       | Control ribozyme g833                    |
| pCS4082   | pCS4077       | Control ribozyme g862                    |
| pCS4084   | pCS4076       | Control ribozyme sTRSV                   |
| pCS4083   | pCS4076       | Control ribozyme sTRSVctl                |
| pCS4085   | pCS4076       | Control ribozyme g814                    |
| pCS4086   | pCS4076       | Control ribozyme g833                    |
| pCS4087   | pCS4076       | Control ribozyme g862                    |
| pCS4088   | pCS4076       | Theophylline switch Theo-AAAAA           |
| pCS4089   | pCS4076       | Theophylline switch Theo-CAGAA           |
| pCS4090   | pCS4076       | Theophylline switch Theo-AGAAA           |
| pCS4091   | pCS4076       | Theophylline switch Theo-AGGAA           |
| pCS4092   | pCS4076       | Theophylline switch Theo-CAUAA           |
| pCS4093   | pCS4076       | Theophylline switch Theo-CUGAA           |
| pCS4094   | pCS4076       | Theophylline switch Theo-CUUGA           |
| pCS4095   | pCS4076       | Theophylline switch Theo-UGGUA           |
| pCS4096   | pCS4076       | Theophylline switch Theo-CGGCA           |



|         |                                  |                                                                                                           |
|---------|----------------------------------|-----------------------------------------------------------------------------------------------------------|
| pCS4097 | pCS4076                          | Theophylline switch Theo-GAAAG                                                                            |
| pCS4098 | pCS4076                          | Theophylline switch Theo-AUUCA                                                                            |
| pCS4099 | pCS4076                          | Theophylline switch Theo-AAAGA                                                                            |
| pCS4100 | pCS4076                          | Xanthine switch Xan-AAGAAG                                                                                |
| pCS4101 | pCS4076                          | Xanthine switch Xan-ACGAAG                                                                                |
| pCS4102 | pCS4076                          | Xanthine switch Xan-ACGAG                                                                                 |
| pCS4103 | pCS4076                          | Xanthine switch Xan-GAGAAG                                                                                |
| pCS4104 | pCS4076                          | Xanthine switch Xan-GCGAG                                                                                 |
| pCS4105 | pCS4076                          | Xanthine switch Xan-AAGACG                                                                                |
| pCS4106 | pCS4076                          | Xanthine switch Xan-GCGUAA                                                                                |
| pCS4107 | pCS4076                          | Xanthine switch Xan-GAGUG                                                                                 |
| pCS4108 | pCS4076                          | c-di-GMP-II switch cdGII-CCAAUG                                                                           |
| pCS4109 | pCS4076                          | c-di-GMP-II switch cdGII-CGGAA                                                                            |
| pCS4110 | pCS4076                          | c-di-GMP-II switch cdGII-CGUAA                                                                            |
| pCS4111 | pCS4076                          | c-di-GMP-II switch cdGII-CGUGAA                                                                           |
| pCS4115 | pCS4076                          | Folinic acid switch Fol-AUAGAG                                                                            |
| pCS4116 | pCS4076                          | Folinic acid switch Fol-UAAGG                                                                             |
| pCS4117 | pCS4076                          | Folinic acid switch Fol-UGAGG                                                                             |
| pCS4118 | pCS4076                          | Folinic acid switch Fol-UGAUG                                                                             |
| pCS4119 | pCS4076                          | Folinic acid switch Fol-UGGAG                                                                             |
| pCS408  | pcDNA3.1(+)                      | EGFP cloned into KpnI/XhoI of pcDNA3.1(+)                                                                 |
| pCS4120 | pCS408                           | Control ribozyme sTRSV                                                                                    |
| pCS4121 | pCS408                           | Control ribozyme sTRSVctl                                                                                 |
| pCS4122 | pCS408                           | Folinic acid switch Fol-AUAGAG                                                                            |
| pCS4123 | pCS408                           | Folinic acid switch Fol-UAAGG                                                                             |
| pCS4124 | pCS408                           | Folinic acid switch Fol-UGAGG                                                                             |
| pCS4125 | pCS408                           | Folinic acid switch Fol-UGAUG                                                                             |
| pCS4126 | pCS408                           | Folinic acid switch Fol-UGGAG                                                                             |
| pCS4127 | pCS408                           | Folinic acid switch Fol-UGAAG                                                                             |
| pCS4128 | pcDNA5/FRT                       | Human reduced folate carrier 1 SLC19A1                                                                    |
| pCS4129 | pcDNA5/FRT                       | Human proton-coupled folate transporter 1 SLC46A1                                                         |
| pCS4130 | pcDNA5/FRT                       | Saccharomyces cerevisiae flr1p                                                                            |
| pCS4131 | pcDNA5/FRT                       | Human folate receptor 1 FOLR1                                                                             |
| pCS4132 | pcDNA5/FRT                       | Human folate receptor 2 FOLR2                                                                             |
| pCS4133 | pcDNA5/FRT                       | Human folate receptor 3 FOLR3                                                                             |
| pCS4134 | pCDH-EF1 $\alpha$ -MCS-(PGK-GFP) |                                                                                                           |
|         | Cat #.                           |                                                                                                           |
|         | CD811A-1                         | Human reduced folate carrier 1 SLC19A1 for lentiviral transduction, copGFP transduction marker            |
| pCS4135 | pCDH-EF1 $\alpha$ -MCS-(PGK-GFP) |                                                                                                           |
|         | Cat #.                           |                                                                                                           |
|         | CD811A-1                         | Human proton-coupled folate transporter 1 SLC46A1 for lentiviral transduction, copGFP transduction marker |

- *E. coli* antibiotic resistance for all plasmids is ampicillin.

Supplementary Table 9. List of folate transporters tested for folinic acid transport. Annotated gene sequence legend: purple, overlap with vector pcDNA5/FRT for Gibson assembly; red, kozak sequence; regular font: coding sequence of the gene; yellow highlight, overlap sequence for assembly of two qBlocks for the coding sequence of the gene; green: 5' UTR or 3'UTR.

| Name                                   | Sequence (5' → 3')                                                                                                                                                                                                                                                                                                                                                                                                                                                                                                                                                                                                                                                                                                                                                                                                                                                                                                                                                                                                                                                                                                                                                                                                                                                                                                                                                                                                                                                                                                                                                                                                                                                                                                                                                                                                                                                                                                                                                                                                                                                                                                                                                                                                                                                   |
|----------------------------------------|----------------------------------------------------------------------------------------------------------------------------------------------------------------------------------------------------------------------------------------------------------------------------------------------------------------------------------------------------------------------------------------------------------------------------------------------------------------------------------------------------------------------------------------------------------------------------------------------------------------------------------------------------------------------------------------------------------------------------------------------------------------------------------------------------------------------------------------------------------------------------------------------------------------------------------------------------------------------------------------------------------------------------------------------------------------------------------------------------------------------------------------------------------------------------------------------------------------------------------------------------------------------------------------------------------------------------------------------------------------------------------------------------------------------------------------------------------------------------------------------------------------------------------------------------------------------------------------------------------------------------------------------------------------------------------------------------------------------------------------------------------------------------------------------------------------------------------------------------------------------------------------------------------------------------------------------------------------------------------------------------------------------------------------------------------------------------------------------------------------------------------------------------------------------------------------------------------------------------------------------------------------------|
| Human reduced folate carrier 1 SLC19A1 | <p>aaattaatacgaactcactatagggagaccaagctggctagcgtttaacttaagcttgggtaccGCCACCatg<br/> gtgccctccagcccagcgggtggagaagcaggtgcccggtggaacctgggctgaccccagctccg<br/> gtcttgggggcacctcgtgtgctacctttgcttctacggcttcatggcgcagatacggccaggggaga<br/> gcttcacaccccctacctcctggggcccgacaagaactcacgcgggagcaggtcacaacagagat<br/> cacgccggtgtctgtactcctacctggccgtgtgtgtgcccggttctctgctaccgactacctgcg<br/> ctacacgccgggtgctgctgctgcaggggctcagcttcgtgtcggtgtggctgctgctgctgctggcc<br/> actcgggtggcgacatgcagctcatggagctcttctacagcgtcaccatggccgcgcacatgcctat<br/> tctcctacatcttctctctgctggcccgcgcgtaccagcgtgtggccggctactcgcgcgtgcg<br/> gtgctgctggcggtttaccagctccgtgctggccagctgctggtcactgtggccgagctctcttc<br/> tccacgtcaactacatctcgtgaccttctcacttcagcgtggtctcgccttctctgaagcgcc<br/> ccaagcgcagcctcttctcaaccgcgacgaccggggcggtgcgaaacctcggttggagctgg<br/> agcgcatgaatcctggcccagggcgggaagctgggacacgccctgcgggtggcctggtgggactca<br/> gtgctggcgcggatgtcggggagctgggggacagcctgcggcgccgagctgcgcctgtggct<br/> cctctggtgggtctcaactcggccggctactacctgggtggtctactacgtgcacatcctgtggaacga<br/> gggtggaccccaccaccaacagtgcgcgggtctacaacggcgcggcagatgctgcctccacgctgct<br/> ggcgccatcagctcttcgccggggctcgtgaagatccgctgggcgcgctggtccaagctgctc<br/> atcgcgggcgtcacggccacgcaggggggctggtcttcttctggcgcacacgcgccaccggagc<br/> agcatctggctgtgctatgcggcctcgtgctgttccgcggctcctaccagttctcgtgcccatcgca<br/> ccttcagattgcatcttctgtctaaagactctgtgccctggctctcggggtcaacacgttctttgccac<br/> catcgtcaagaccatcacttctcattgtctcgagcgtgcggggcctgggctcccgggtccgcaagc<br/> agttccagttatactccgtgtacttctgatcctgtccatcatctacttctgggggcatgctggatggcc<br/> tgcggcactgccagcggggccaccaccgcggcagccccggcccagggcctgaggagtccgcg<br/> ggaggagaaggcagcacaggcactgagcgtgcaggacaaggcctcggaggcctgcagccagc<br/> ccagagcccggccttccccagaagacagcctgggggctgtggggccagcctccctggagcaga<br/> gacagagcgaccatactggcccagggccccggccccgcaggcagctgaattcctgagcccagtg<br/> acaacccctccccctgactctgtgctcgcgccaagcctcaggcctgaggctgcagatgagacttg<br/> tcccagctggctgtccatcctcctggtgtcagcaagctgggtttcagtgcttccaagcagcgtgtt<br/> cagaatgtgaaccagtgactctcggggccctgtggttaacttgcaggcggccctcagtgatccccacgac<br/> cctgctcagggcgccctgcttagcaatggggcctccgcttatcctgctagcagggcccctagattcccc<br/> ctgcccgtgccgactctggcgggtgccacagcgtgctgctcagtgctgagctctagaggcccgtttaaacccgctgat<br/> cagcct</p> |

|                                                          |                                                                                                                                                                                                                                                                                                                                                                                                                                                                                                                                                                                                                                                                                                                                                                                                                                                                                                                                                                                                                                                                                                                                                                                                                                                                                                                                                                                                                                                                                                                                                                                                                                                                                                                                                                                                                                                                                              |
|----------------------------------------------------------|----------------------------------------------------------------------------------------------------------------------------------------------------------------------------------------------------------------------------------------------------------------------------------------------------------------------------------------------------------------------------------------------------------------------------------------------------------------------------------------------------------------------------------------------------------------------------------------------------------------------------------------------------------------------------------------------------------------------------------------------------------------------------------------------------------------------------------------------------------------------------------------------------------------------------------------------------------------------------------------------------------------------------------------------------------------------------------------------------------------------------------------------------------------------------------------------------------------------------------------------------------------------------------------------------------------------------------------------------------------------------------------------------------------------------------------------------------------------------------------------------------------------------------------------------------------------------------------------------------------------------------------------------------------------------------------------------------------------------------------------------------------------------------------------------------------------------------------------------------------------------------------------|
| <p>Human proton-coupled folate transporter 1 SLC46A1</p> | <p>agaccaagctggctagegtttaaacttaagcttgggtaccGCCACCatggaggggagcgcgagc<br/> ccccggaaaagccccgcgccgcctgcggctgcccgtgctgtgccggggcccggtagagccgct<br/> ggtcttctggccaactttgcttggctcctgcagggcccgtcaccacgcagtatctgtggaccgctc<br/> agcggcgaactcggctacaatggcaccgccaaaggggggctgcagcaaccgcagcggacc<br/> ccaccatgcaggaagtggagaccctfacctcccactggaccctctacatgaactggggcgttctctg<br/> gtggggctcttctcgtccaccctgctgggagcttggagcgacagtgtggccgcccgctgtagt<br/> gctggcctcgtggcctgctgctccaggccctagtgtccgtttttgtggctgcagctgcagctccact<br/> cggctactctgctgggtgcacatctttgtccctcctcggcgactcgggtggccttctggctgtagct<br/> ttcgtccgtggcagatgtcagctccagtcgcagccgcaccttccggatggccctgctggaagccag<br/> catcgggggtggctgggatgctggcaagcctcctcggggccactggctccggggccagggttatgc<br/> caacccttctggctggccttggccttgcctgtagccatgactctctatgcagcttctgcttggtagac<br/> ctaaaggagccaaagtccaccggcctctcagcttccgtcaccaccgatccattgtccagctctatgtg<br/> gctcccggccagagaagtccaggaaacatttagcccttactactggccatctctgtgtgatcact<br/> gtgacttggggcccaggacatcttaaccctttatgaactaagcacaccctctgctgggactccaaa<br/> ctaateggctatggttctgcagctcagcactcctcctacctcaccagcctgctggccctgaagctctgc<br/> agtactgctggccgatgctggtagctgagatcggcctggcctcaacatcctgggatggtggct<br/> ttgcttggccactatcacgctctcatgttcacaggataggggtgcttttctgctcattagctacaccc<br/> tgcacccgggtaaacctccaagctggtgagagagacagagcagggtgctctcttttctgctgtggc<br/> ctgtgtgaatagcctggccatgctgacggcctccggcatctcaactactctaccagccactctgaa<br/> ctttatgaagggttccccttctctgggagctggcctcctgctcaccggctgttctgattgggatgc<br/> tggaaaaggctgatctcactcaggtccagcagttccccagagccctgatctgctggaccaga<br/> agacagagggcaagaggagcaagtgaaaccaagcaactggaggtctgcagctggaagcccag<br/> ccctcagcttagagggcccgtttaaaccgctgatcagcct</p>                                                                                                                                                                                                            |
| <p>Saccharomyces cerevisiae flr1p</p>                    | <p>agaccaagctggctagegtttaaacttaagcttgggtaccGCCACCatggtctacaccagcaccta<br/> cagacacaccatcgtggtggactgctggaatacctggcctcgtgtccaacctggaacctgcag<br/> agcggcagagaggacgagacaagaaagcccagaaacaccgataagaaagagtgcagcccgact<br/> acgacatcagtgctggcccataagaagctgcagcagagcagcaccgacagcagatgctctggc<br/> agccagatcagaagaacgacccttcagagtggactggaacggccctagcagcccagaaatcct<br/> cagaattggcccctgctgaagaaaagcctgggtggttccagatcatgctgctgacctgctgacctac<br/> atgggcagcagcactacaccctggccaagagtacatccaagaggaatccacgtgggacacgtg<br/> gtggccacactgaacctgagcctgtacgtgctcggctatggcctgggacatcatcttaccctctg<br/> agcgagacagccagatacggcaggctgaacctgtatgtgacacctgttcttttcatgatcttccaagt<br/> gggctgcgccaccgtgcacaatatcggaggactgatcgtgatgcggtcatcagcggcatcctgtgct<br/> ctccatctctggcaacaggcgggaggaacctggccgatatcatcagccctgagatggtgctctggtg<br/> ctcggaatgtggagtctggtgctgtggctgctcctgttctggtccacttctgggagccgctatggtg<br/> acgccaagaactggccttcatcttctggctgctgatgtggctgagcggccaccttctctgctgg<br/> cattcttttccccgaaacgcaaccacaacatcctgtacagacgggcccgaagctgagggaagag<br/> acaggcagcagcggactacaccgagcaggacaagctggacagagaagtggatcccggacctt<br/> cctgateaacacctgtaccggcctctgaaaatgatcaaaagagcccgcacctctggccttgcacct<br/> gtacattgccgtggcctacggctgcttctacctgttcttegaggccttctctatgcttctggtggcatc<br/> ccacttcagctggtggaagtcggcctggcctatatggcctctgtgtgggatgtgtgctgcttacggc<br/> ctgtttggcctcctgaacatgaggatcctgtgccccgggtcagaacggcacttctaccagaggca<br/> ttctgatcgtggctatgtgctgtgtggtgctgctcctctgtctctgttctgctgctgagaccgagg<br/> gtgactggatcctgctgtgatcagcaggtgttctctgctgctgcccgtgtcaacatctccaggcca<br/> ccttcgctacctggccacatgctaccctaaatacgtggcctccgtgttcggcggcaacggcttctgta<br/> gagccagcttcgctgtgcttccactgttcggcagagctatgtacgacaatctggccaccaagaact<br/> acccgtggcctgggatctagcctgctgggatttctgactctggcctcgcacatcttcccttcatct<br/> gtataagctacggcccagcctgcccagaccagaagcagctacacagaggaatgactcagcttagagg<br/> gcccgtttaaaccgctgatcagcct</p> |

|                                          |                                                                                                                                                                                                                                                                                                                                                                                                                                                                                                                                                                                                                                                                                                                                                                                                                                                                                                                                                                                                                                                                                                                                                                                                                                                                                                                                                                                              |
|------------------------------------------|----------------------------------------------------------------------------------------------------------------------------------------------------------------------------------------------------------------------------------------------------------------------------------------------------------------------------------------------------------------------------------------------------------------------------------------------------------------------------------------------------------------------------------------------------------------------------------------------------------------------------------------------------------------------------------------------------------------------------------------------------------------------------------------------------------------------------------------------------------------------------------------------------------------------------------------------------------------------------------------------------------------------------------------------------------------------------------------------------------------------------------------------------------------------------------------------------------------------------------------------------------------------------------------------------------------------------------------------------------------------------------------------|
| <p>Human folate receptor 1<br/>FOLR1</p> | <p>agaccaagctggctagcgtttaaacttaagcttggctaccaggagcctggctggctgctcacatacaat<br/>aattaactgctgagtgcccttcgcccaatcccagctccactcctggctccattcccactcctgctg<br/>tctcctaggccactaaaccacagctgtccctggaataaggcaagggggagtgtagagcagagcag<br/>aagcctgagccagacggagagccactccttcccaggaactgaacccaaaggatcacctggtattc<br/>cctgagagtagacagatttctcggcgtggccctcaagggacagacatgctcagcggatgacaacaca<br/>gctgctgctccttctagtgtgggtgctgtagtagggaggctcagacaaggattgcatgggccaagga<br/>ctgagcttctcaatgtctgcatgaacgccaagcaccacaaggaaaagccaggccccgaggacaagtt<br/>gcatgagcagtgctgaccctggaggaagaatgctgctgttctaccaacaccagccaggaagcccat<br/>aaggatgttctacctatataagattcaactggaaccactgtggagagatggcactgctgcaaacgg<br/>catttcatccagacacctgctctacagtgctcccccaactggggcctggatccagcaggtggat<br/>cagagctggcgcaaaagagcgggtactgaacgtgccctgtgcaagaggactgtgagcaatggtgg<br/>gaagattgtcgacctctacactgcaagagcaactggcacaagggctggaactggacttcagggtt<br/>taacaagtgcgcagtgaggctgctgccaacttccatttctacttcccacaccactgttctgtgca<br/>atgaaatctggactcactcctacaaggtcagcaactacagccgaggagtgccgctgcatccagat<br/>gtggttcgaccagcccaggggcaacccaatgaggaggtggcaggttctatgtcagccatgagt<br/>ggggctgggcccctgggcagcctggccttctgcttagcctggcccaatgctgctgtgctgctcag<br/>ctgacctcctttacttctgatactggaaatcctgcccctgttcagccccacagctccaactatttgg<br/>tctgctccatgctgggctctgacagccacttgaataaacagacaccgcacatgtgttctgagaat<br/>tattggaaaaaaaaaaaaaaaaactcgagctagagggcccgtttaaaccgctgatcagcct</p> |
| <p>Human folate receptor 2<br/>FOLR2</p> | <p>agaccaagctggctagcgtttaaacttaagcttggctaccattcactcagtgcttaccagagcgcgtt<br/>ctacctgtaccgaagacagaggctgtggggacagcctaggggctggatctattgctacttagaga<br/>gaggccaactcagacacagccgtgatgctcccagcagcaacggagggtcagctccgctgaggg<br/>acagaaagacatggtctggaatggatgccacttctgctctctgtgctgtagccaccatgtcagt<br/>gcccaggacaggactgatctcctcaatgtctgtatggatgccaagcaccacaagacaagccaggtc<br/>ctgaggacaagctgcatgaccaatgcagtcctggaagaagaatgctgctgcacagccagcaca<br/>gccaggagctgcacaaggacacctcccgcctgtacaactttaaactgggaccactgcccgaagatgga<br/>gcccgcctgcaagcgcacttcatccaggacacctgtctctatagtgctcaccacactggggccct<br/>ggatccagcaggtgaatcagagctggcgcaaaagaacgcttctggatgtgcccttatgaaaaggga<br/>ctgtcagcgtggtgggagattgtcacacctcccacacgtgcaagagcaactggcacagaggatg<br/>ggactggacctcaggagtaacaagtgccagctggggctctgcccacactttagtctacttccc<br/>cactccagctgcccttgtgaaggcctctggagtcactcatacaaggtcagcaactacagccagggga<br/>gcgccgctgcatccagatgtggtttagtcagcccagggcaacccaacgaggaggtgagggat<br/>ctatgctcagccatgcatgtaagtgtgtgagatgcttcatgggactgggggtctcctgctcagctg<br/>gcccctgatgctgcaactctggctccttggctgagttcagtcctccagactacctgcccctgagctggat<br/>aaccaggctgggctcagctcagctcccacaatgacagccccttaagcatgcttctattagtcacctaa<br/>ccctctgacaccagctgtgtgctcctatgggtgggccaagagtcacttctaataaacagactgtttc<br/>taataattcaaaaaaaaaaaaaaaaaactcgagctagagggcccgtttaaaccgctgatcagcct</p>                                                                     |
| <p>Human folate receptor 3<br/>FOLR3</p> | <p>agaccaagctggctagcgtttaaacttaagcttggctaccaggagcaagctggctcagagcctggacct<br/>acagcgtgttgggtgaggtcctgcccaggaatagatggacatggcctggcagatgatcagctg<br/>ctgcttctggcttgggtgactgctgcccggagtgcccagcccaggagtgccgggccaagcagcagc<br/>ctgctcaatgtctgcatgaacgccaagcaccacaagacacagcccagccccgaggacgagctgat<br/>ggccagtgcagtcctggaagaagaatgctgctgcacggccagcaccagccaggagctgcaca<br/>ggacacctcccgcctgtacaactttaaactgggatcactgtgtaagatggaacccacctgcaagcgc<br/>actttatccaggacagctgtctctatgagtgctcaccacactggggcctggatccggcaggtcaacc<br/>agagctggcgcaaaagagcgattctgaacgtgcccctgtgcaaaaggagctgtgagcgtggtggg<br/>aggactgtcgacctcctacactgcaaaagcaactggcacaaggctggaattggactcagggat<br/>taatgagtgccggccgggcccctctgcagcacctttagtctacttcccactccagccgccccttgt<br/>gaaggcctctggagccactcctcaaggtcagcaactatagtcgaggagcggccgctgcatccaga<br/>tgtggttactcagcccagggcaacccaatgaggaggtggccaagttctatgtcggccatgaat<br/>gctggggccccgtctgtgggattattgattctgatccaagaagggtcctctggggttctccaacaac<br/>ctattctaatagacaaatccacatgtaaaaaaaaaaaaaaaaactcgagctagagggcccgtttaa<br/>accgctgatcagcct</p>                                                                                                                                                                                                                                                                                                                                               |

## **Supplementary Note 1. FACS-Seq noise**

Sequencing read depth is typically correlated with data quality. The FACS-Seq and RNA-Seq assays had the same sequencing coverage; however, the data quality was poorer for FACS-Seq than RNA-Seq (Figure 2e, Figure 3c). For both FACS-Seq and RNA-Seq, sequences were filtered with a cutoff of 100 reads under each ligand and replicate condition, which was empirically determined to result in good replicate agreement for RNA-Seq (Supplementary Figure 3). In addition, the median read count coverage of the same libraries was slightly higher in FACS-Seq than in RNA-Seq. Thus, the assays should exhibit similar measurement accuracy, if the nature of the source of dispersion is similarly random. A directly comparable FACS-Seq and RNA-Seq experiment with flanking unique coverage index (UCI, consisting of 4 to 6 random bases on each side of the switch insert, and added on during the library construction step (Supplementary Figure 1a)) was performed to monitor for loss in library sequence coverage and diversity from the start of the library construction process through to the end of the sequencing results. For RNA-Seq, the UCI count was nearly identical to the read count for both RNA and DNA sequences (Supplementary Figure 21). In contrast, the UCI count for FACS-Seq sequences was 10-fold less than the sequence read count (Supplementary Figure 22), indicating a substantial loss in sampling coverage of library members in the library propagation, FACS, and sequencing process.

The FACS-Seq assay exhibits greater noise in the resulting measurements compared with the RNA-Seq assay likely due to the former's reliance on lentiviral library transduction.

Lentiviral transduction allows for the propagation of library DNA over many cell generations, and ensures one integration event per cell via a Poisson process for uniquely linking genotype to phenotype<sup>1</sup>. However, recent reports indicate that lentiviral transduction exhibits a high rate of recombination events due to the pseudo-double stranded lentiviral particle genome, resulting in

higher rates of template switching<sup>2,3</sup>. The recombination events can result in silenced expression of one of the fluorescent proteins unrelated to the activity of the encoded ribozyme switch. The workflow also requires enrichment for lower basal expression constructs by an initial sorting round which can inadvertently enrich for constructs in which reporter expression is silenced by mechanisms other than ribozyme self-cleavage. Another source of noise can be associated with the much longer duration of the FACS-Seq experiment versus the RNA-Seq experiment (~30 days versus ~3 days for template DNA to be in a cellular context), from lentiviral production to multiple rounds of sorting and cell passaging, resulting in more time for mutations to accumulate in the cell lines outside the sequenced region.

## Supplementary Note 2. Data de-noising using AutoML

We compared RNA-Seq results to FACS-Seq results in order to determine if RNA-Seq results are predictive of FACS-Seq results for the sequence-dependent regulatory activity of ribozyme switches. However, the higher noise levels from the FACS-Seq results prevented any conclusions from being drawn with confidence. Data noise reduction is possible if there is sufficient information in the FACS-Seq results for some underlying sequence-function relationships to be learned, such that the subset of data with higher quality can reinforce a model that learned these principles, while excluding data that are random noise. We used an automated implementation of several regression models using the AutoML algorithm in an R implementation of H2O.ai, including generalized linear model, distributed random forests, gradient boosting machine (tree-based ensemble model), and deep learning. If sequences within a switch library share an overarching set of principles that determine its sequence-dependent gene-regulatory activity, a model that learns this set of principles will be more robust to experimental noise, i.e., effectively “denoising” the data. To prepare the data, sequence identity and position are transformed into one-hot encoded 1's and 0's at each base and position, and normalized RNA levels and relative fluorescence levels in the no-ligand condition, and activation ratios are standardized such that the mean is rescaled to zero and the standard deviation is rescaled to 1. In each of theophylline, xanthine, folinic acid, and cyclic di-GMP libraries, denoising with AutoML significantly increased the fraction of sequences identified by both RNA-Seq and FACS-Seq as having high activation ratios (Supplementary Figure 6).

To further investigate the learned sequence motifs by the model, we performed gradient boosting tree regression (GBM) for xanthine and theophylline libraries on RNA-Seq normalized RNA levels and FACS-Seq relative fluorescence values. The gradient boosting machine (GBM) and deep learning consistently outperform the other models in AutoML. While deep learning models typically perform a few percentage points better than GBM, training deep learning

models requires significantly greater computing time and power. GBM can quickly extract sequence-function relationships without compromising performance. For both theophylline and xanthine libraries, we found that GBM effectively improves the replicate correlation of RNA-Seq and FACS-Seq data (Supplementary Figure 5a-c, f-h). This results in a greater number of sequences being characterized with greater quantitative accuracy. Without denoising, only 665 theophylline sequences with >100 read count coverage were characterized with RNA-Seq for a replicate  $R^2 = 0.80$ . After GBM denoising, 1,275 unique sequences with just >20 reads show a replicate correlation of  $R^2 = 0.91$  (Supplementary Figure 5a). The improvement in FACS-Seq correlation is less pronounced (Supplementary Figure 5b), but the model drastically improves the correlation between RNA-Seq and FACS-Seq results, raising  $R^2$  from 0.34 to 0.74 (Supplementary Figure 5c). It can be seen from the plot comparing FACS-Seq and RNA-Seq that this improvement in correlation is a result of identifying and relabeling the subset of sequences that have low mCherry/BFP ratios but high RNA/DNA ratios. The model has likely learned some underlying sequence-function principles that predict these sequences to give high mCherry/BFP ratios, as the RNA-Seq results would suggest. The improvement on replicate correlation by denoising also lends support to the hypothesis that the greater noise in the FACS-Seq data could be a result of silenced mCherry expression in the lentiviral library-transduced cells. Even though the model does not correlate as strongly with the original raw data (Supplementary Figure 5d), the fact that replicate measurements from independently trained models demonstrate stronger correlation is evidence for the model picking up on underlying motifs (Supplementary Figure 5e). For the xanthine library, replicates for both RNA-Seq and FACS-Seq are strongly correlated due to greater sequencing depth and coverage, which does not leave much room for the denoising improvement. However, as with the theophylline library, there is a sharp increase in correlation between RNA-Seq and FACS-Seq, along with the removal of the “silenced” sequences (Supplementary Figure 5f-j).



GBM models are complex ensembles of weaker models, and are consequently not very interpretable beyond the relative importance metric of each position and base in contributing to function. The relative importance pattern of the sequence-position features agree strongly between replicates and remain similar between RNA-Seq and FACS-Seq experiments, which can account for, at least in part, the improved correlation between the two assay results (Supplementary Figure 5e). Other than the position in the last base of loop II, the relative importance profiles do not agree completely with the entropy analyses of the top 5<sup>th</sup> percentile of sequences with the lowest mRNA and protein expression levels. Future studies to improve the interpretability of GBMs could improve our understanding on how the sequence features identified herein with greater relative importance contribute to sequence-dependent ribozyme switches function.

### **Supplementary Note 3. Folic acid ribozyme switches interact with the mCherry coding sequence leading to misfolding**

Engineered molecular devices can interact with surrounding sequences in undesired ways, and care needs to be taken to ensure the modularity of the engineered device<sup>4,5</sup>. When the folic acid switch library was first screened in RNA-seq along with the other switch libraries in the mCherry vector, the library activity exhibited higher basal expression than the other libraries (Supplementary Figure 12a), even though bulk library *in vitro* cleavage, which was performed without the mCherry sequence, was comparable to the other switch libraries (Supplementary Figure 8). The activation ratio for individually assayed mCherry-linked folic acid switches reached up to 1.9 fold (Supplementary Figure 12b); however, the same switches when used to control eGFP-expression exhibit activation ratios up to 5.3 fold (Figure 4k). Computational folding of the mCherry-linked ribozyme switch suggested that part of the folic acid aptamer and sTRSV ribozyme stem III can interact with the mCherry coding sequence (Supplementary Figure 12c). The RNA-Seq assay was repeated for the folic acid library inserted in the 3' UTR of an enhanced green fluorescent protein (eGFP) reporter, which is not predicted to similarly misfold with the folic acid switch sequence. Our data show that basal RNA expression of the eGFP-linked folic acid switch was decreased for every library member (Supplementary Figure 12d) by up to ~2.8 fold. The decrease in basal RNA expression leads to increased activation ratios of normalized RNA levels as measured by RNA-Seq by up to ~2 fold (Supplementary Figure 12e).

## References

1. Fehse, B., Kustikova, O. S., Bubenheim, M. & Baum, C. Pois(s)on – It's a Question of Dose.... *Gene Ther.* **11**, 879–881 (2004).
2. Inoue, F. *et al.* A systematic comparison reveals substantial differences in chromosomal versus episomal encoding of enhancer activity. *Genome Res.* **27**, 38–52 (2017).
3. Murtha, M. *et al.* FIREWACH: high-throughput functional detection of transcriptional regulatory modules in mammalian cells. *Nat. Methods* **11**, 559–565 (2014).
4. Kosuri, S. *et al.* Composability of regulatory sequences controlling transcription and translation in *Escherichia coli*. *Proceedings of the National Academy of Sciences* **110**, 14024–14029 (2013).
5. Lou, C., Stanton, B., Chen, Y.-J., Munsy, B. & Voigt, C. A. Ribozyme-based insulator parts buffer synthetic circuits from genetic context. *Nat. Biotechnol.* **30**, 1137–1142 (2012).
